# Supplementary material for: An exploration of available methods and tools to improve the efficiency of systematic review production: a scoping review
Source: Springer Nature journal article supplement (doi:10.1186/s12874-024-02320-4), 2024-09-18
Supplement: MOESM1 [file 12874_2024_2320_MOESM1_ESM.docx]

Appendix 1. Search strategy

Ovid MEDLINE (Update Search)

| **#** | **Searches** | **Results** |
| --- | --- | --- |
| 1 | exp *artificial intelligence/ or exp *machine learning/ | 112794 |
| 2 | *Automation/ | 4435 |
| 3 | *Data Mining/ | 5821 |
| 4 | *Natural Language Processing/ | 3990 |
| 5 | *Crowdsourcing/ | 1016 |
| 6 | *Medical Informatics/ | 9959 |
| 7 | (automat* or machine learning or crowd sourcing or crowdsourcing or data mining or text mining or text categori?ation or supervised learning or active learning or document similarity or similarity based or similarity measure or text similarity or machine based or artificial intelligence or text analy* or data analy* or computation*).ti,kf. | 261531 |
| 8 | automat*.ab. /freq=2 | 73277 |
| 9 | ((machine or supervised or active) adj learning).ab. /freq=2 | 26019 |
| 10 | (crowd sourc* or crowdsourc*).ab. /freq=2 | 791 |
| 11 | ((data or text) adj (mining or categori?ation or analy?)).ab. /freq=2 | 2896 |
| 12 | ((document or based or measure or text) adj1 similarity).ab. /freq=2 | 731 |
| 13 | (machine based or artificial intelligence or computation*).ab. /freq=2 | 60461 |
| 14 | or/1-13 | 431553 |
| 15 | *"review literature as topic"/ or *systematic reviews as topic/ | 5447 |
| 16 | exp *Evidence-Based Medicine/ | 27249 |
| 17 | *clinical trials as topic/ or exp *controlled clinical trials as topic/ | 55925 |
| 18 | (reviews or meta analyses or metaanalyses or syntheses or guidelines).ti,kf. | 116332 |
| 19 | (reviews or meta analyses or metaanalyses or syntheses or guidelines).ab. /freq=3 | 66635 |
| 20 | or/15-19 | 235616 |
| 21 | 14 and 20 | 2812 |
| 22 | ((automat* or computation* or software) adj3 (classif* or screen* or assess* or citation? or article? or trial? or study? or search* or identif* or extract* or task? or process* or technique? or tool?)).ti,ab,kf. | 120009 |
| 23 | (machine adj4 (classif* or screen* or assess* or citation? or article? or trial? or study? or search* or identif* or extract* or task? or process* or technique? or tool?)).ti,ab,kf. | 35079 |
| 24 | exp "Information Storage and Retrieval"/mt [Methods] | 17093 |
| 25 | Data Collection/mt [Methods] | 13014 |
| 26 | "Abstracting and Indexing"/ | 4927 |
| 27 | ((review* or synthes?s or studies or trials) adj8 (task? or process* or method* or approach* or tool? or software? or algorithm? or automat* or conduct* or develop* or undertak* or perform*)).ti,kf. | 83545 |
| 28 | 22 or 23 or 24 or 25 or 26 or 27 | 265783 |
| 29 | "review literature as topic"/ or systematic reviews as topic/ | 21152 |
| 30 | exp Evidence-Based Medicine/ | 76714 |
| 31 | *clinical trials as topic/ or exp *controlled clinical trials as topic/ | 55925 |
| 32 | (reviews or meta analyses or metaanalyses or syntheses or guidelines).ti,ab,kf. | 715039 |
| 33 | ((studies or trials or papers or documents or articles or reports) adj4 (retriev* or screen* or identif* or find* or assess* or access* or extract*)).ti,ab,kf. | 441924 |
| 34 | 29 or 30 or 31 or 32 or 33 | 1194709 |
| 35 | 28 and 34 | 29962 |
| 36 | (faster or quicker or expedit* or accelerat*).ti,ab,kf. | 534525 |
| 37 | ((reduc* or decreas* or less*) adj4 (effort or workload or number? or time)).ti,ab,kf. | 404893 |
| 38 | ((increas* or improv*) adj2 (efficiency or validity or process* or production or power)).ti,ab,kf. | 188190 |
| 39 | ((novel or innovat* or moderni* or new) and (method* or process* or approach* or tool? or software? or algorithm? or technique? or review?)).ti. | 171427 |
| 40 | 36 or 37 or 38 or 39 | 1258537 |
| 41 | 35 and 40 | 2530 |
| 42 | 21 or 41 | 5136 |
| 43 | limit 42 to yr="1997 -Current" | 4955 |

Ovid Embase (Update Search)

| **#** | **Searches** | **Results** |
| --- | --- | --- |
| 1 | *"automation"/ or *"natural language processing"/ or *"crowdsourcing"/ or *"medical informatics"/ or exp *"artificial intelligence"/ or exp *"machine learning"/ | 242810 |
| 2 | (automat* or machine-learning or crowd-sourcing or crowdsourcing or data-mining or text-mining or text-categori?ation or supervised-learning or active-learning or document-similarity or similarity-based or similarity-measure or text-similarity or machine-based or artificial-intelligence or text-analy* or data-analy* or computation*).ti,kw. | 300864 |
| 3 | automat*.ab. /freq=2 | 106033 |
| 4 | ((machine or supervised or active) adj learning).ab. /freq=2 | 31689 |
| 5 | (crowd sourc* or crowdsourc*).ab. /freq=2 | 887 |
| 6 | ((data or text) adj (mining or categori?ation or analy?)).ab. /freq=2 | 3674 |
| 7 | ((document or based or measure or text) adj1 similarity).ab. /freq=2 | 751 |
| 8 | (machine based or artificial intelligence or computation*).ab. /freq=2 | 65841 |
| 9 | or/1-8 | 538905 |
| 10 | *"clinical trial (topic)"/ or exp "systematic review (topic)"/ or *"evidence based medicine"/ or exp *"controlled clinical trial (topic)"/ | 75838 |
| 11 | (reviews or meta-analyses or metaanalyses or syntheses or guidelines).ti,kw. | 148053 |
| 12 | (reviews or meta analyses or metaanalyses or syntheses or guidelines).ab. /freq=3 | 94718 |
| 13 | or/10-12 | 277492 |
| 14 | 9 and 13 | 2890 |
| 15 | ((automat* or computation* or software) adj3 (classif* or screen* or assess* or citation? or article? or trial? or study? or search* or identif* or extract* or task? or process* or technique? or tool?)).ti,ab,kw. | 152739 |
| 16 | (machine adj4 (classif* or screen* or assess* or citation? or article? or trial? or study? or search* or identif* or extract* or task? or process* or technique? or tool?)).ti,ab,kw. | 42939 |
| 17 | exp *"documentation"/ or exp *"data processing"/ or exp *"information processing"/ | 1256417 |
| 18 | ((review* or synthes?s or studies or trials) adj8 (task? or process* or method* or approach* or tool? or software? or algorithm? or automat* or conduct* or develop* or undertak* or perform*)).ti,kw. | 89676 |
| 19 | 15 or 16 or 17 or 18 | 1462209 |
| 20 | *"clinical trial (topic)"/ or exp "systematic review (topic)"/ or *"evidence based medicine"/ or exp *"controlled clinical trial (topic)"/ | 75838 |
| 21 | (reviews or meta analyses or metaanalyses or syntheses or guidelines).ti,ab,kw. | 1034719 |
| 22 | ((studies or trials or papers or documents or articles or reports) adj4 (retriev* or screen* or identif* or find* or assess* or access* or extract*)).ti,ab,kw. | 588689 |
| 23 | or/20-22 | 1590484 |
| 24 | 19 and 23 | 90008 |
| 25 | (faster or quicker or expedit* or accelerat*).ti,ab,kw. | 683942 |
| 26 | ((reduc* or decreas* or less*) adj4 (effort or workload or number? or time)).ti,ab,kw. | 566889 |
| 27 | ((increas* or improv*) adj2 (efficiency or validity or process* or production or power)).ti,ab,kw. | 238559 |
| 28 | ((novel or innovat* or moderni* or new) and (method* or process* or approach* or tool? or software? or algorithm? or technique? or review?)).ti. | 222865 |
| 29 | or/25-28 | 1655109 |
| 30 | 24 and 29 | 6934 |
| 31 | 14 or 30 | 9517 |
| 32 | limit 31 to yr="1997 -Current" | 9274 |
| 33 | limit 32 to embase | 5067 |
| 34 | limit 32 to conference abstracts | 2384 |
