# Supplementary material for: An exploration of available methods and tools to improve the efficiency of systematic review production: a scoping review
Source: Springer Nature journal article supplement (doi:10.1186/s12874-024-02320-4), 2024-09-18
Supplement: MOESM2 [file 12874_2024_2320_MOESM2_ESM.docx]

| **#** | **First author, Year** | **Method or tool assessed** | **Approach** | **Sample description** | **Reference standard** | **Study aim(s)** | **Analyzed review step(s)** | **Reported outcomes** |
| --- | --- | --- | --- | --- | --- | --- | --- | --- |
| 1 | Affengruber, Wagner; 2020 [1] | **Method:** Rapid review methods:abbreviated searches,single abstract/full-text screening | Internal  validity study  No real-time workflow testing | 3 SRs, 50508 references | Traditional systematic review process | To explore the validity of a rapid review approach that combines a substantially abbreviated literature search with a single-reviewer screening of abstracts and full texts using three case studies | - Combination of abbreviated methods | - Validity outcomes - Impact on results |
| 2 | Armijo-Olivo, 2020 [2] | **Tool:** RobotReviewer RoB assessment | External validity study  No real-time workflow testing | 372 RCTs | Consensus ratings of manual RoB assessments | To determine the accuracy and reliability of RoB assessments from RobotReviewer compared to human reviewers. | - Critical appraisal | - Validity outcomes |
| 3 | Arno, 2022 [3] | **Tool:** RobotReviewer RoB assessment | Internal validity study  Real-time workflow testing | 145 RCTs | Consensus ratings of a third reviewer | To determine the accuracy and person-time required of RobotReviewer-assisted RoB  assessments compared to human-only RoB assessments. | - Critical appraisal | - Workload saving - Validity outcomes |
| 4 | Belter, 2016 [4] | **Method:** Citation based searching | Internal validity study  No real-time workflow testing | 14 SR including 141 studies | Traditional text-based keyword searching for SR | To propose a method of searching the literature by systematically mining the various types of citation relationships between articles and testing the method by comparing its precision and recall to that of 14 published systematic reviews. | - Search strategy and database search | - Workload saving - Validity outcomes |
| 5 | Beyer, 2013 [5] | **Method:** Restricted database search, testing 15 databases | Internal comparative study  No real-time workflow testing | 1 SR including 31 studies | Included studies of a finished SR | To assess the performance of 15 database searches and the smallest combination of databases that would need to have been searched to retrieve all the included studies. | - Search strategy and database search | - Validity outcomes |
| 6 | Borissov, 2022 [6] | **Tool:** Deduklick | Internal validity study  No real-time workflow testing | 8 datasets, more than 60.000 references | Manual deduplication multistep process using EndNote by information specialist | To assess the deduplication tool Deduklick with a large dataset. | - Deduplication | - Validity outcomes |
| 7 | Buscemi, 2006 [7] | **Method:** Single reviewer data extraction | External validity study  No real-time workflow testing | 1 SR including 30 RCTs | Data extraction method in duplicate | To describe and compare the frequency of errors that accompany single vs. double data extraction, compare the estimate of treatment effect derived from these methods, and compare the time requirements for these methods. | - Data extraction | - Workload saving - Impact on results - Validity outcomes |
| 8 | Chai, 2021 [8] | **Tool:** Research screener for semi-automated abstract screening | Internal validity study  Real-time workflow testing  Stopping criterion: at 5%, 10%, 15%, 20% and 25% screened (threshold) | 9 SRs and 2 scoping reviews, from 331 to 25527 references, 4 to 84 included studies  1 prospective real-world review, 12981 references | Manually performed screenings | To introduce and report initial evidence on the utility of Research Screener in a validity study analysis including 11 reviews and in a real-world review. | - Title and abstract selection | - Workload saving - Time-saving - Cost-saving - Validity outcomes |
| 9 | Chapman, 2010 [9] | **Method:** SCOPUS approach | Internal validity study  No real-time workflow testing | 1 SR, 817 references | Traditional manual search approach | To determine the validity and efficiency of a new manual search method that utilizes the SCOPUS database, reference lists of relevant articles were electronically downloaded, deduplicated and only new references were screened dually versus manually and dually screening reference lists. | - Additional search | - Time-saving - Validity outcomes |
| 10 | Clark, 2020 [10] | **Tool:** Polyglot Search Translator (PST) | External validity study  No real-time workflow testing | 10 database search strings | Search strings, independently developed by two researchers | To evaluate whether using the PST as a search translation aid reduces the time required to translate search strings without increasing errors. | - Search strategy and database search | - Time-saving - Validity outcomes |
| 11 | Clark, 2021 [11] | **Tools:** SRA- Deduplicator,EndNote, Polyglot Search Translator (PST), RobotReviewer, SRA-Helper | External comparative study  Real-time workflow testing | 1 SR, 596 references | Two external experienced reviewers | To compare SR tasks done manually, using standard methods (manual team), versus those same SR tasks done using SRA tools (automation team), assessing the difference in time to complete the SR task and the impact on the error rate of the SR task. | - Combination of tools | - Workload saving - Validity outcomes |
| 12 | Cleo, 2019 [12] | **Tools:** Covidence, SRA-Helper for EndNote, Rayyan, RobotAnalyst | External comparative study  Real-time workflow testing | 882 references, ~220 references were used per tool evaluation | NR | To gather qualitative data on the usability and acceptability of four systematic review automation software packages for the citation screening step of a systematic review. | - Title and abstract selection | - Usability |
| 13 | Cowie, 2022 [13] | **Tools:** AbstrackR,Covidence, DAA, DistillerSR, EPPI-Reviewer Web, Rayyan, RobotANalyst, RobotReviewer LIVE, SWIFT-Active Screener, Systematic Review Accelerator | External comparative study  No real-time workflow testing | 53 SR tools | None | To provide a basis for comparing and selecting between web-based software tools that support SR, by conducting a feature-by-feature comparison of SR tools | - Deduplication - Update search - Title and abstract selection - Data extraction - Critical appraisal | - Usability |
| 14 | Dechartres, 2018 [14] | **Method:** Removing non-English publications from meta-analyses | External validity study  No real-time workflow testing | 147 meta-analyses | Meta-analyses including non-English language publications | To compare treatment effects between published and unpublished randomized controlled trials (RCTs) and between trials published in English and other languages using a meta-epidemiologic approach. | - Search strategy and database search | - Impact on results |
| 15 | dos Reis, 2023 [15] | **Tool:** Abstrackr, Colandr, Rayyan | External comparative study  No real-time workflow testing  No stopping criterion (rank-based) | 1 SR, 1650 references | Manual screening | To investigate the performance and subjective Usability of three semi-automated title-abstract screening tools. | - Title and abstract selection | - Validity outcomes - Workload saving - Time-saving - Usability |
| 16 | Egger, 2003 [16] | **Method:** Removing non-English publications from meta-analyses | Internal validity study  No real-time workflow testing | 50 meta-analyses | Meta-analyses including non-English language publications | To assess the impact of excluding non-English trials on effect estimates. | - Search strategy and database search | - Impact on results |
| 17 | Ewald, 2020 [17] | **Method:** Restricted database searching | Internal comparative study  No real-time workflow testing | 47 MAs, 444 RCTs | Comprehensive Cochrane review searches | To assess the agreement of treatment effect estimates from meta-analyses based on abbreviated or comprehensive literature searches. | - Search strategy and database search | - Impact on results |
| 18 | Ewald, 2022 [18] | **Method:** Restricted database searching | Internal comparative study  No real-time workflow testing | 60 SRs, 2080 references (96.8% RCTs/quasi-RCTs) | Comprehensive Cochrane review searches | To assess changes in coverage, recall, review, conclusions and references not found when searching fewer databases. | - Search strategy and database search | - Validity outcomes - Impact on results |
| 19 | Furuya-Kanamori, 2022 [19] | **Method:** Abbreviated search strategies by limiting search date | External comparative study  No real-time workflow testing | 156 diagnostic accuracy SRs including 12.784 studies with 846 meta-analyses | Published SRs including all studies | To investigate validity and possible changes in the pooled estimates if the rapid review approach – by limiting the search date to the recent 1, 2, 3, 4, 5, 10, 15, 20, 25, 30, 35 and 40 years – was applied. | - Search strategy and database search | - Validity outcomes - Impact on results |
| 20 | Garthlehner, 2019 [20] | **Tool:** DistillerSR | External validity study  No real-time workflow testing  No stopping criterion (rank-based) | 1 SR, 2472 references | Published SRs including 42 RCTs, dually screened | To conduct a case study to explore a screening approach that temporarily replaces a human screener with a semi-automated screening tool. | - Title and abstract selection | - Workload saving - Validity outcomes |
|  | Gartlehner, 2020 [21] | **Method:** Single Screening | Internal comparative study  No real-time workflow testing | 2 SRs, 2000 references | Dual independent screening | To determine the accuracy of single-reviewer screening in correctly classifying abstracts as relevant or irrelevant for literature reviews. | - Title and abstract selection | - Validity outcomes |
|  | Gates, 2019 [22] | **Tool:** Abstrackr, DistillerSR, RobotAnalyst | External comparative study  No real-time workflow testing  No stopping criterion (rank-based) | 3 SRs , 29246 references | Traditional SR process | To explore the performance of three machine learning tools designed to facilitate Title and abstract selection in systematic reviews. | - Title and abstract selection | - Workload saving - Time saving - Validity outcomes |
| 21 | Gates,, 2020a [23] | **Tool:** Abstrackr | External validity study No real-time workflow testing  No stopping criterion (rank-based) | 11 SRs and 5 RRs, convenience sample of 16 reviews for which adequate data were available | Dual independent screening | To evaluate the benefits and risks of using the Abstrackr to semi-automate title-abstract screening and to explore whether Abstrackr’s predictions varied by review or study-level characteristics. | - Title and abstract selection | - Workload saving - Time-saving - Validity outcomes |
| 23 | Gates, 2020b [24] | **Tool:** Abstrackr | External validity study  No real-time worklfow testing  No stopping criterion (rank-based) | 11 SRs and 5 RRs | Traditional SR process | To evaluate the benefits and risks of using the Abstrackr machine learning tool to semi-automate title-abstract screening and explored whether Abstrackr’s predictions varied by review or study-level characteristics. | - Title and abstract selection | - Workload saving - Validity outcomes |
| 24 | Gates, 2021a [25] | **Tool:** ExaCT | External validation  Real-time workflow testing | 75 RCTs | Manual data extraction by one reviewer and verification by another reviewer | To evaluate ExaCT’s ability to (a) automatically extract data  elements from randomized trials, and (b) save time compared with manual extraction and verifcation. | - Data extraction | - Time-saving - Validity outcomes |
| 25 | Gates, , 2021b [26] | **Method:** PubMed similar articles search, Scopus citation tracking | Internal comparative study  Real-time workflow testing | 1 SR | Traditional full update search | To explore the value of complementary search approaches in terms of search performance, impact on results and conclusions, screening workload, and feasibility compared to the reference standard. | - Update search | - Time-saving - Validity outcomes |
| 26 | Gates, Johnson & Hartling; 2018 [27] | **Tool:** Abstrackr | External validity study  No real-time workflow testing  No stopping criterion (rank-based) | 3 SRs and one descriptive analysis, 12763 to 5893 references each | Dual independent screening by two human reviewers | To evaluate Abstrackr's semi-automated performance in comparison to dual screening by two humans. | - Title and abstract selection | - Workload saving - Validity outcomes |
| 27 | Gates, Vandermeer & Hartling; 2018 [28] | **Tool:** RobotReviewer | External validity study  No real-time workflow testing | 10 SR, including 1180 studies | Dual independent RoB assessments using the Cochrane RoB Tool. | To evaluate the reliability of RobotReviewer's risk of bias judgments. | - Critical appraisal | - Validity outcomes |
| 28 | Giummarra, 2020 [29] | **Tools:** Abstrackr | External validity study  No real-time workflow testing  Stopping criterion: until no more predicted relevant records (threshold) | 1 SR , 10.559 references | Single screening | To examine the performance of text mining in supporting the second reviewer in a systematic review | - Title and abstract selection | - Workload saving - Time-saving - Validity outcomes |
| 29 | Glanville, 2006 [30] | **Method:** Abbreviated search strategies for RCTs with Cochrane highly sensitive search strategy | Internal validity study  No real-time workflow testing | 4 random samples of RCTs and matching random samples of non-trial records published in 4 different years | A gold standard of 1,347 RCT records and a comparison group of 2,400 non-trials were randomly selected from MEDLINE. | To assess whether the widely used 1994 Cochrane Highly Sensitive Search Strategy for RCTs in MEDLINE could be improved in terms of sensitivity, precision, or parsimony. | - Search strategy and database search | - Validity outcomes |
| 30 | Goossen, 2018 [31] | **Method:** Restricted database searching, testing MEDLINE, Web of Science, CENTRAL, EMBASE | Internal comparative study  No real-time workflow testing | 10 SR, a median of 694 references | A gold standard of SRs identified by searching the three most high-impact journals of general surgery | To determine which electronic databases contribute best to a literature search in surgical systematic reviews | - Search strategy and database search | - Validity outcomes |
| 31 | Guimarães, 2022 [32] | **Tool:** EndNote, Mendeley,Rayyan, Systematic Review Accelerator and Zotero | External comparative study  No real-time workflow testing | 5933 references identified in 5 databases | Manual deduplication by two blinded independent reviewers | To examine accuracy measures of a set of automated deduplication tools to identify duplicates in the systematic review process. | - Deduplication | - Validity outcomes |
| 32 | Haas, 2021 [33] | **Tool:** Risklick search platform | Internal validity study  No real-time workflow testing | A common set of search queries rerun on three search platforms | Search queries that were executed on cliniclatrials.gov and PubMed | To compare search query outcomes of Risklick AI to clinicaltrials.gov and PubMed on COVID-19 pharmacologically relevant treatments, as considered by the authorities. | - Search strategy and database search | - Validity outcomes |
| 33 | Hair, 2023 [34] | **Tool:** ASySD, Systematic Review Assistant Deduplication Module (SRA-DM) | Internal validity study  No real-time workflow testing | 5 unseen search datasets of various sizes (1.845-79.880 references) | EndNote’s automated deduplication | To explore the performance of our Automated Systematic Search Deduplicator (ASySD), a novel tool to perform automated  deduplication of systematic searches for biomedical reviews. | - Deduplication | - Validity outcomes |
| 34 | Hamel, 2020 [35] | **Tool:** DistillerSR | External validity study  No real-time workflow testing  No stopping criterion (rank-based) | 10 SR including 69.663 references | Dual independent reviewing of the 10 completed SRs | To evaluate the performance of the DistillerSR to determine the reduction in screening burden and Time-savings | - Title and abstract selection | - Workload saving - Impact on results - Validity outcomes |
| 35 | Harrison, 2020 [36] | **Tool:** Abstrackr, Covidence, EPPI-Reviewer, Rayyan | Usability study  No real-time workflow testing  No stopping criterion (rank-based) | NR | NR | To evaluate the usability of the best performing tools that support Title and abstract selection to enable researchers to select the most appropriate for their work. | - Title and abstract selection | - Usability |
| 36 | Hartling, 2017 [37] | **Method:** Removing non-English publications from meta-analyses | Internal validity study  No real-time workflow testing | 129 meta-analyses | Meta-analyses including non-English language publications | To examine the impact of searching for and including non-English studies, unpublished studies, and dissertations on the results of existing SRs. | - Search strategy and database search | - Impact on results |
| 37 | Hemens, 2012 [38] | **Tool:** McMaster Premium LiteratUre Service (PLUS), Clinical Queries | External comparative study  No real-time workflow testing | 87 updates of SRs with meta-analyses | Updating literature using Cochrane Controlled Trials Register, MEDLINE and EMBASE with Clinical Queries filters | To compare the performance of McMaster Premium LiteratUre Service (PLUS) and Clinical Queries (CQs) to that of the Cochrane Controlled Trials Register, MEDLINE, and EMBASE for locating studies added during an update of reviews | - Updating literature | - Impact on results - Validity outcomes |
| 38 | Hirt, 2021 [39] | **Tool:** RobotReviewer | External validity study  No real-time workflow testing | 23 SRs including 190 RCTs | Human assessment reported in Cochrane reviews | To evaluate the agreement between RobotReviewer’s and human reviewers’ risk of bias  Assessment in nursing-related RCTs | - Critical appraisal | - Validity outcomes |
| 39 | Howard, 2020 [40] | **Tool:** SWIFT-Active Screener | Internal validity study  No real-time workflow testing  Stopping criterion: estimated recall (threshold) | 26 SRs , from 104 to 48.638 references each | Dual independent screening of 26 SRs | To describe SWIFT active screener’s development and to investigate its performance in a simulation study. | - Title and abstract selection | - Workload saving - Validity outcomes |
| 40 | Hugues, 2020 [41] | **Method:** Removing non-English publications from meta-analyses | Internal validity study  No real-time workflow testing | 9 meta-analyses | Meta-analyses including non-English language publications | To compare effect estimates between studies published in non-English language and those published in English language included in previously published meta-analyses. | - Search strategy and database search | - Impact on results |
| 41 | Janssens, 2015 [42] | **Method:** Citation based searching | Internal validity study  No real-time workflow testing | Two sets of published meta-analyses; n=10, 44618 references; n=42, 100.628 references | Conventional keyword-based searches | To propose a novel search strategy and to demonstrate its efficiency and accuracy. | - Search strategy and database search | - Workload saving - Validity outcomes |
| 42 | Janssens, 2020 [43] | **Method:** Citation-based searching | Internal validity study  No real-time workflow testing | 250 SRs | Conventional keyword-based searches | To reproduce the literature searches of published systematic reviews and meta-analyses and  assess whether this method retrieves all eligible articles while screening fewer titles. | - Search strategy and database search | - Validity outcomes |
| 43 | Jap, 2019 [44] | **Tool:** Data Abstraction Assistant (DAA) | Usability study  Real-time workflow testing | 52 individual data abstractors | NR | To survey early users about their experience using the DAA. | - Data extraction | - Usability |
| 44 | Jardim, 2022 [45] | **Tool:** RobotReviewer | Usability study  Real-time workflow testing | 2 SRs including 26 RCTs | Two reviewers independently doing critical appraisal | To assess if RobotReviewer is accurate and acceptable in real time assessments of risk of bias questions. | - Critical appraisal | - Validity outcomes - Usability |
| 45 | Jelicic Kadic, 2016 [46] | **Tool:** Plot Digitizer | External validity study  No real-time workflow testing | 22 RCTs | Manual data extraction | To compare speed and accuracy of graphical data extraction using manual estimation and open-source software. | - Data extraction | - Time-saving - Validity outcomes |
| 46 | Kiritchenko, 2010 [47] | **Tool:** ExaCT | Internal validity study  No real-time workflow testing | Training set: 132 studies; Testing set: 50 RCTs | Manual data extraction | To extract information elements from full-texts, not abstracts and to implement a range of different techniques to cover 21 information elements | - Data extraction | - Time-saving - Validity outcomes |
| 47 | Kwon, 2015 [48] | **Tools:** OVID, EBSCO, RefWorks, Endnote, Mendeley | External comparative study  No real-time workflow testing | Citation samples based on rerun search strategies for one SR, 1087 and 1262 references | Two gold standard sets, screened and de-duplicated by hand | To compare effectiveness of different options for deduplicating records retrieved from systematic review searches. | - Deduplication | - Time-saving - Validity outcomes |
| 48 | Lee, 2012 [49] | **Method:** Abbreviated search strategies for systematic reviews and meta-analyses, testing 31 search filters | Internal comparative study  No real-time workflow testing | 31 search filters assessed  Training set: 53 references  Testing set: 219 references | A gold standard set based on previous work | To describe the development and validity study of the health-evidence.ca Systematic Review search filter and to compare its performance to other available systematic review filters | - Search strategy and database search | - Validity outcomes |
| 49 | Li, 2019 [50] | **Tool:** Data Abstraction Assistant (DAA)  **Method:** Single data abstraction plus verification | Internal comparative study  No real-time workflow testing | 4 SRs including 48 studies | Independent dual data abstraction plus adjudication | To evaluate the data abstraction assistant facilitated single data abstraction and single data abstraction plus verification with reference standard. | - Data extraction | - Time-saving - Validity outcomes |
| 50 | Li, 2023 [51] | **Tool:** Abstrackr, SWIFT-review, Rayyan | External comparative study  No real-time workflow testing  No stopping criterion (rank-based) | 1 SR from which 500 references were sampled | Manual dual screening | To evaluate five different screening methods including three text-mining methods (using different tools) | - Title and abstract selection | - Time-saving - Validity outcomes |
| 52 | Marshall, 2016 [52] | **Tool:** RobotReviewer | Internal validity study  No real-time workflow testing | 12808 studies | Human-extraction of independent RoB assessments Cochrane SRs | To compare model performance with the consistency of RoB assessments in published systematic reviews and to help judge to what extent bias assessments could be automated in real review production | - Critical appraisal | - Validity outcomes |
| 51 | Marshall, 2019 [53] | **Method:** Rapid review methods: searching only PubMed, excluding older articles (5, 7, 10, 15, and 20 years before the search date), excluding smaller trials (<50, <100, and <200 participants), and using the largest trial only. | Internal comparative study  No real-time workflow testing | 2512 SRs including 16088 studies | Cochrane reviews | To evaluate the effects of rapid review methods on the numbers of lost studies and the resultant changes in meta-analysis results | - Combination of abbreviated methods | - Impact on results |
| 53 | Marshall, 2023 [54] | **Tool:** RobotReviewer LIVE | Internal validity study  Real-time workflow testing | 1 SR update | Conventional manual update of a living systematic review on COVID-19 vaccination evidence | To compare the performance of RobotReviewer LIVE in identifying newly published trials (AI in combination with human expertise) to a conventional update of a systematic review. | - Update search | - Usability - Validity outcomes |
| 54 | Martyn-St James, 2017 [55] | **Method:** Rapid review methods for identifying RCTs: search for SRs and individual RCTs, data extraction of RCTs from already published SRs and data from RCTs not reported in any review directly extracted | Internal validity study  Real-time workflow testing | HTA report, including 2283 references, 41 RCTs included | Traditional systematic review method | To compare the validity of a rapid review method with full systematic review methods. | - Combination of abbreviated methods | - Impact on results |
| 55 | Mateen, 2013 [56] | **Method:** Titles-first screening | Internal validity study  No real-time workflow testing | 1 SR, 2965 references | Final inclusions in SR | To test whether titles-first screening followed by title-abstract screening is more efficient and equally valid compared to conventional title-abstract screening | - Title and abstract selection | - Validity outcomes |
| 56 | McKeown, 2021 [57] | **Tool:** Ovid, EndNote, Mendeley, Zotero,  Covidence, Rayyan | Comparative  No real-time workflow testing | 3130 references from 4 databases | Manual deduplication | To examine the accuracy and efficiency of commonly used electronic methods for flagging and removing duplicate references during this process. | - Deduplication | - Validity outcomes |
| 57 | Moher, 2000 [58] | **Method:** Removing non-English publications from meta-analyses | Internal validity study  No real-time workflow testing | 18 meta-analyses | Meta-analyses including non-English language publications | To examine whether language restricted meta-analyses, compared to language inclusive meta-analyses, provide different estimates of the effectiveness of interventions evaluated in randomized trials. | - Search strategy and database search | - Impact on results |
| 58 | Mortensen, 2017 [59] | **Method:** Crowdsourcing | Internal validity study  No real-time workflow testing | 4 SRs; 4749, 1664, 8071, and 5774 references respectively | Traditional manual method by trained experts | To investigate the potential of crowdsourcing to reduce the workload involved in citation screening for systematic reviews | - Title and abstract selection | - Cost saving - Validity outcomes |
| 59 | Muthu, 2022 [60] | **Tool:** ASReview | External validity study  No real-time workflow testing  No stopping criterion (rank-based) | 3 SRs, 4953 references | Traditional systematic review method | To analyze the efficiency of a machine learning-assisted platform as an end-user to aid in the screening of the articles for selection into systematic review in orthopaedic surgery. | - Title and abstract selection | - Workload saving - Validity outcomes |
| 60 | Nama, 2017 [61] | **Method:** Crowdsourcing | Validation  No real-time workflow testing | 148 references | Trained expert approach | To determine whether a crowd with no project specific training or expertise could accurately determine study eligibility for a systematic review. | - Title and abstract selection | - Workload saving - Validity outcomes |
| 61 | Nama, 2019 [62] | **Method:** Crowdsourcing | Internal validity study  No real-time workflow testing | 6 SRs, 2194 references | Trained expert approach | To determine whether a crowd would be willing to perform and complete abstract and full text screening and to assess the quality of the crowd’s work, including retention of eligible citations (sensitivity) and work performed for the investigative team, defined as the percentage of citations excluded by the crowd. | - Title and abstract selection - Full-text selection | - Workload saving - Validity outcomes |
| 62 | Ng, 2014 [63] | **Method:** Crowdsourcing | Internal comparative study  No real-time workflow testing | 1 SR, 650 references | Experienced SR authors | To compare if modality or technology used for screening may affect the accuracy or efficiency and therefore compared student screening performance using four alternative screening modalities. | - Title and abstract selection | - Workload saving - Time-saving - Validity outcomes |
| 63 | Noel-Storr, 2020 [64] | **Method:** Crowdsourcing (combined with Screen4Me) | Internal validity study  No real-time workflow testing | 1 SR, 2472 references | SR of RCTs performed traditionally | To assess the accuracy and autonomy of a crowd in collectively classifying studies as either potentially relevant or not relevant | - Title and abstract selection | - Workload saving - Validity outcomes |
| 64 | Noel-Storr, 2021a [65] | **Method:** Crowdsourcing (combined with Screen4Me) | Internal validity study  Real-time workflow testing | 1021227 references | Screening decisions of two experts (three pairs across three evaluations) | To evaluate the performance of Cochrane Crowd in terms of its accuracy, capacity, and autonomy and to examine contributor engagement across three tasks aimed at identifying randomized trials. | - Title and abstract selection | - Validity outcomes |
| 65 | Noel-Storr, 2021b [66] | **Method:** Crowdsourcing (combined with Cochrane Crowd) | Internal validity study  Real-time workflow testing | 1 SR, 9546 references | SR of RCTs performed traditionally | To assess crowdsourcing in combination with machine learning in Cochrane Crowd to identify relevant studies compared to final decisions made by core author team. | - Title and abstract selection | - Time-savings - Validity outcomes |
| 66 | Noel-Storr, 2022 [67] | **Method:** Crowdsourcing (combined with Cochrane Crowd) | Internal validity study  No real-time workflow testing | 4 RR, 14299 references | SR of RCTs performed traditionally | To test whether a crowd could accurately assess study eligibility for reviews under time constraints. | - Title and abstract selection | - Validity outcomes |
| 67 | Nussbaumer- Streit, 2018 [68] | **Method:** Restricted database searching, 4 abbreviated approaches (combinations of MEDLINE, Embase, CENTRAL with and without searches of reference lists) | Internal comparative study  No real-time workflow testing | 60 SRs including 1335 studies | Comprehensive literature searches (Cochrane reviews) | To assess whether bodies of evidence that are based on abbreviated literature searches lead to different conclusions compared with bodies of evidence that are based on comprehensive, systematic literature searches and hence could be a viable methodological shortcut, especially for rapid reviews | - Search strategy and database search | - Impact on results |
| 68 | Nussbaumer- Streit, 2020 [69] | **Method:** Restricted language searching, English only | Internal validity study  No real-time workflow testing | 59 SRs including 1281 studies | All publications included in the reviews (i.e., without language restrictions | To assess whether limiting the inclusion criteria to English-language publications affected the overall conclusions in a set of systematic reviews and hence could be a viable methodological shortcut, especially for rapid reviews. | - Search strategy and database search | - Impact on results |
| 69 | O'Keefe, 2022 [70] | **Tool:** PubReMiner,MeSH on Demand, Yale MeSH Analyzer | External comparative study  No real-time workflow testing | 1 SR | Search strategy from an experienced information specialist in Ovid-MEDLINE | To assess text-mining tools and report the intuitiveness of use, potential biases and contributions to the design of a search strategy for a Diagnostic Test Accuracy (DTA) review. | - Search strategy and database search | - Usability - Validity outcomes |
| 70 | Olofsson, 2017 [71] | **Tool:** Rayyan | External validity study  Real-time workflow testing  Stopping criterion: at 25%, 50% and 75% screened (threshold) | 3 ongoing SR and 3 reviews | Manual approach, screening with Endnote or screening with printed word lists | To examine the effectiveness of the text mining functionality of the abstract screening tool Rayyan | - Title and abstract selection | - Workload saving - Usability |
| 71 | Oude Wolcherink, 2023 [72] | **Tool:** ASReview | External validity study  No real-time workflow testing  Stopping criterion: at 5%, 7.5%, 10%, 15% and 20% screened and when 50, 100, 150 and 200 irrelevant articles found (threshold) | 1 SR, 4994 references | Manual screening (reference standard divided into (1) included full-texts and (2) final inclusions | To examine the accuracy and efficiency when using the semi-automated title-abstract screening tool of ASReview on a systematic review in health economics. | - Title and abstract selection | - Validity outcomes - Time-saving |
| 72 | Ouzzani, 2016 [73] | **Tool:** Rayyan | Internal validity study  No real-time workflow testing  No stopping criterion (rank-based) | Testing classifier:  15 review test collections, ranging from 310 to 3465 references. Testing app: 2 SRs, 273 and 1030 references | Reviews performed through conventional methods | To develop a tool to expedite the initial screening of abstracts and titles using a process of semi-automation but with a clear objective of incorporating a level of usability which would be compatible with the skillset of a broad cross-section of potential users | - Title and abstract selection | - Workload saving - Time-saving - Usability - Validity outcomes |
| 73 | Pallath, 2022 [74] | **Tool:** Paperfetcher | Internal validity study  No real-time workflow testing | NR | Manual handsearching | To compare the process of manual handsearching and automated handsearching with Paperfetcher's web-application. | - Additional search | - Time-saving - Usability |
| 74 | Paynter, 2021 [75] | **Tools:** Freely available text mining tools (PubReMiner, MeSH on Demand, Yale MeSH Analyzer) | External comparative study  Real-time workflow testing | 7 systematic evidence syntheses; 1166, 1258, 5063, 3308, 11988, 2183, and 8279 references respectively | Developing searches manually | To compare the process of developing searches with and without using text-mining tools for evidence synthesis products. | - Search strategy and database search | - Time-saving - Validity outcomes |
| 75 | Pham, 2005 [76] | **Method:** Restricted language searching, English only | Internal validity study  No real-time workflow testing | 42 SRs including 662 RCTs | Language-inclusive systematic reviews | To assess whether language of publication restrictions impact the estimates of an intervention’s effectiveness, whether such impact is similar for conventional medicine and complementary medicine interventions, and whether the results are influenced by publication bias and statistical heterogeneity. | - Search strategy and database search | - Impact on results |
| 76 | Pham, 2016 [77] | **Methods:** Rapid review methodological shortcuts including single reviewer screening | Internal comparative study  No real-time workflow testing | 3 SRs/meta-analyses | Standard full SR, without shortcuts | To assess the potential implications of methodological shortcuts on the outcomes of systematic reviews. | - Combination of abbreviated methods | - Impact on results - Validity outcomes |
| 77 | Pianta, 2018 [78] | **Method:** Crowdsourcing with CrowdCARE | Internal validity study  No real-time workflow testing | 71 SRs | Expert consensus ratings | To examine the validity of CrowdCARE approach for assessing the methodological quality of systematic reviews. | - Critical appraisal | - Validity outcomes |
| 78 | Pijls, 2024 [79] | **Tool:** ASReview | External validity study  No real-time workflow testing  No stopping criterion (rank-based) | 3 SRs; 420, 1167, 683 references respectively | Manual abstract screening | To assess the performance of the semi-automated title-abstract screening tool of ASReview in the context of orthopaedics. | - Title and abstract selection | - Workload saving - Validity outcomes |
| 79 | Pradhan, 2019 [80] | **Tool:** EXACT | Internal validity study  No real-time workflow testing | 3 SRs, with meta-analyses of a total of 28 outcomes | Manual data extraction | To describe the development of EXACT and to assess its accuracy. | - Data extraction | - Time-saving - Validity outcomes |
| 80 | Preston, 2015 [81] | **Method:** Restricted database searching, testing MEDLINE and EMBASE | Internal comparative study  No real-time workflow testing | 9 SRs | Traditional, more extensive search methods | To examine whether a restricted search methodology is worthwhile for diagnostic test accuracy studies. | - Search strategy and database search | - Workload saving - Validity outcomes |
| 81 | Przybyla, 2018 [82] | **Tool:** RobotAnalyst | Internal validity study  Real-time workflow testing  No stopping criterion (rank-based) | 22 reference collections, with a total of 43 610 abstract-level decisions | Random Title and abstract selection, no prioritization used | To assess the usefulness of RobotAnalyst for accelerating screening. | - Title and abstract selection | - Workload saving - Validity outcomes |
| 82 | Rathbone, 2015 [83] | **Tool:**  Abstrackr | External validity study  No real-time workfow testing  Stopping criterion: binary predictions retrieved for remaining records (threshold) | 4 SRs | Traditional screening method | To evaluate the performance of Abstrackr. | - Title and abstract selection | - Workload saving - Validity outcomes |
| 83 | Rathbone, 2017 [84] | **Method:** PICO-based title-only screening | Internal validity study  No real-time workflow testing | 10 SRs, 31359 references | Completed SRs performed traditionally | To evaluate the feasibility of PICO-based title-only screening for scoping searches and rapid reviews. | - Title and abstract selection | - Workload saving - Validity outcomes |
| 84 | Reddy, 2020 [85] | **Tools:** RobotAnalyst, Abstrackr  **Method:** Review of Reviews | Internal comparative study  Real-time workflow testing  Stopping criterion: binary predictions retrieved for remaining records (threshold) | 1 SR, 3128 references | Traditional screening, dually and independently | To compare the traditional systematic review approach with a review-of-reviews approach and semi-automation of two tools as strategies to update the evidence. | - Title and abstract selection | - Workload saving - Time-saving - Validity outcomes |
| 85 | Rice, 2017 [86] | **Method:** Clinical Query search combined with PubMed related articles search | Internal validity study  No real-time workflow testing | 9 SRs, 55099 references | Traditional | To test the effectiveness of a simplified search strategy for RCTs for updating systematic reviews. | - Update search | - Validity outcomes |
| 86 | Royle & Waugh, 2005 [87] | **Method:** Abbreviated search strategies for RCTs with brief RCT search strategy | Internal validity study  No real-time workflow testing | 57 SRs | Traditional Cochrane review search process | To determine the effect on the results of Cochrane reviews of using a brief RCT search strategy. | - Search strategy and database search | - Workload saving - Impact on results - Validity outcomes |
| 87 | Sampson, 2016 [88] | **Method:** Clinical Query search combined with PubMed related articles search | Internal validity study  No real-time workflow testing | 16 SRs, whereof 6 Cochrane reviews updates and 10 Agency for Healthcare Research and Quality Evidence reviews | Traditional update procedure | To test whether the combined approach of a focused Clinical Query search paired with a second search using the Similar Articles feature of PubMed can yield high recall with reasonable precision. | - Update search | - Validity outcomes |
| 88 | Schopow, 2023 [89] | **Tool:** ChatGPT | External validity study  Real-time workflow testingrank | 1 SR | Traditional SR process: manual generated search strategy, dual screening, dual data extraction | The task of conducting a systematic review (including two human reviewers) was augmented using ChatGPT. | - Title and abstract selection - Full-text screening - Data extraction | - Validity outcomes |
| 89 | Shemilt, 2016 [90] | **Method:** Single screening, with or without text mining | Internal comparative study  No real-time workflow testing | 1 SR, 12477 references | Relative comparison of screening methods. The ‘safety first’ was the method actually applied in the ‘case study’ SR. | To estimate the incremental Cost (resource use) and effects (recall of studies included in the review) associated with the use of four variant approaches to title-abstract screening in one systematic review and to estimate the incremental cost-effectiveness of using each approach, by combining estimates of incremental costs and effects. | - Title and abstract selection - Full-text selection | - Workload saving - Cost-saving - Validity outcomes |
| 90 | Stoll, 2019 [91] | **Method:** Limited dual reviewing | Internal validity study  Real-time workflow testing | 1 SR, subset of two times 15000 records with an initial 190555 references | Dual reviewing throughout all review steps. | To identify if using dual reviewers throughout the entire study screening process produces a clear benefit over using dual reviewers only at the full-text screening stage in a large systematic review. | - Title and abstract selection - Full-text selection | - Workload saving - Impact on results |
| 91 | Suster, 2023 [92] | **Tools:** RobotReviewer | External validity study  No real-time workflow testing | 8034 SRs, 11724 data instances | RoB assessment from SR | To analyse the calibration and selective classification performance of EvidenceGRADEr and RobotReviewer. | - Critical appraisal | - Validity outcomes |
| 92 | Taylor-Philips, 2017 [93] | **Method:** Rapid review methods: narrower searches, single reviewer screening/data extraction plus 20% checking of second reviewer, unadjusted QUADAS-2 assessment | Internal validity study  No real-time workflow testing | 1 RR, 562 references  1 SR, 2277 references | Conventional systematic review method | To compare the findings of a traditional systematic review with those of an enhanced rapid review (narrow search, single reviewer checking 20% of abstracts and data extraction) conducted by the same research team. | - Combination of abbreviated methods | - Workload saving - Impact on results - Validity outcomes |
| 93 | Thomas, 2021 [94] | **Tool:** RCT Classifier | Internal validity study  No real-time workflow testing | 94305 references | Classified RCTs of Cochrane Reviews | To evaluate a machine learning classifier designed to reduce study identification workload in Cochrane for producing systematic reviews. | - Title and abstract selection | - Validity outcomes |
| 94 | Tsou, 2020 [95] | **Tools:** Abstrackr, EPPI-reviewer | External comparative study  No real-time workflow testing  No stopping criterion (rank-based) | 9 evidence reports | Single reviewer screening | To compare the performance of two machine-learning tools for potential use in citation screening. | - Title and abstract selection | - Workload saving - Validity outcomes |
| 95 | Valizadeh, 2022 [96] | **Tool:** Rayyan | External validity study  No real-time workflow testing  Stopping criterion: binary predictions collected for remaining records after screening 20% (threshold) | 3 SRs, 2054 references | Traditional human reviewer`s final decision | To evaluate the performance of the automated abstract screening tool Rayyan. | - Title and abstract selection | - Validity outcomes |
| 96 | Van de Schoot, 2021 [97] | **Tool:** ASReview | Internal validity study  No real-time workflow testing  No stopping criterion (rank-based) | 4 simulation studies with 2481, 8911, 5782, and 2544 references | Traditional (random) Title and abstract selection | To demonstrate that active learning can yield far more efficient reviewing than manual reviewing while providing high quality and to present the results from Usability tests. | - Title and abstract selection | - Workload saving - Usability - Validity outcomes |
| 97 | Van Enst, 2014 [98] | **Method:** Restricted database searching, testing MEDLINE only | Internal validity study  No real-time workflow testing | 10 SRs with 15 meta-analyses | MEDLINE and at least one other biomedical database | To investigate how the summary estimates in diagnostic test accuracy systematic reviews are affected when searches are limited to MEDLINE. | - Search strategy and database search | - Impact on results - Validity outcomes |
| 98 | Waffenschmidt, 2023 [99] | **Tool:** Rayyan, EPPI Reviewer | External comparative study  Real-time workflow testing  Stopping criterion: at 25%, 50%, and 75% screened (threshold) | 10 HTA searches, 9196 references | Screening decisions of all three single screeners | To investigate prospectively if Rayyan or EPPI Reviewer can increase efficiency with a single-screening approach. | - Title and abstract selection - Full text screening | - Validity outcomes |
| 99 | Waffenschmidt & Guddat, 2015 [100] | **Method:** Abbreviated search strategies for drug-related RCTs with using only the generic drug name | Internal validity study  No real-time workflow testing | 48 SRs including 873 studies | Golden standard set consisting of SRs about drug interventions which at least used two categories of drug search terms from the following: Generic drug name, Drug class, Trade names, Drug acronym, CAS/RN/EC Number | To determine whether a systematic search for RCTs of drugs in MEDLINE and EMBASE via the search interface Ovid, using only the generic drug name in all search fields, produces comprehensive results for the generation of informative SRs. | - Search strategy and database search | - Validity outcomes |
| 100 | Walker, 2022 [101] | **Tool:** Dextr | Internal validity study  No real-time workflow testing | 51 environmental health animal studies | Data extraction by a separate extractor and quality assessment by an independent reviewer | To evaluate Dextr a web-based tool for semi-automated data extraction by comparing semi-automated data extraction including the algorithm that completes the primary extraction, followed by two different QA reviewers compared to the gold standard. | - Data extraction | - Validity outcomes - Time-saving - Usability |
| 101 | Wang, 2014 [102] | **Method:** Dual computer monitors for screening and data extraction | Internal validity study  Real-time workflow testing | 60 SRs; 32 in control group (2400 references) and 55 in intervention group (1653 references) | Using one monitor | To evaluate the effectiveness of using dual monitors on the efficiency of conducting systematic reviews. | - Title and abstract selection - Full-text selection Data extraction | - Time-saving |
| 102 | Xu, 2021 [103] | **Method:** Abbreviated search strategies by limiting search date | Internal comparative study  No real-time workflow testing | 2693 SRs including 21363 meta-analyses | Published SRs | To investigate validity and possible changes in the pooled estimates if the rapid review approach – by limiting the search date to the recent 40, 35, 30, 25, 20, 15, 10, 7, 5, and 3 years – was applied. | - Search strategy and database search | - Workload saving - Impact on results - Validity outcomes |

*Abbreviations: ASReview: Automated Systematic Review, ASySd: Automated Systematic Synthesis and Data extraction, ChatGPT: Chat Generative Pre-trained Transformer (by OpenAI), EPPI: Evidence for Policy and Practice Information and Co-ordinating Centre, ExaCT: Extraction of Citations Tool, HTA: Health Technology Assessment, MeSH: Medical Subject Headings, PICO: Population, Intervention, Comparison, Outcome, PST: Polyglot Search Translator, PLUS: McMaster Premium LiteratUre Service, RCT: randomized controlled trial, RoB: Risk of Bias, SR: systematic review, SRA: Systematic Review Assistant, SWIFT: Sciome Workbench for Interactive Computer-Facilitated Text-mining*

References

1. Affengruber, L., et al., *Combining abbreviated literature searches with single-reviewer screening: three case studies of rapid reviews.* Syst Rev, 2020. **9**(1): p. 162.

2. Armijo-Olivo, S., R. Craig, and S. Campbell, *Comparing machine and human reviewers to evaluate the risk of bias in randomized controlled trials.* Res, 2020. **11**(3): p. 484-493.

3. Arno, A., et al., *Accuracy and Efficiency of Machine Learning-Assisted Risk-of-Bias Assessments in "Real-World" Systematic Reviews : A Noninferiority Randomized Controlled Trial.* Ann Intern Med, 2022. **175**(7): p. 1001-1009.

4. Belter, C.W., *Citation analysis as a literature search method for systematic reviews.* J. Assoc. Soc. Inf. Sci. Technol., 2016. **67**(11): p. 2766-2777.

5. Beyer, F.R. and K. Wright, *Can we prioritise which databases to search? A case study using a systematic review of frozen shoulder management.* Health Info Libr J, 2013. **30**(1): p. 49-58.

6. Borissov, N., et al., *Reducing systematic review burden using Deduklick: a novel, automated, reliable, and explainable deduplication algorithm to foster medical research.* Syst, 2022. **11**(1): p. 172.

7. Buscemi, N., et al., *Single data extraction generated more errors than double data extraction in systematic reviews.* J Clin Epidemiol, 2006. **59**(7): p. 697-703.

8. Chai, K.E.K., et al., *Research Screener: a machine learning tool to semi-automate abstract screening for systematic reviews.* Systematic Reviews, 2021. **10**(1).

9. Chapman, A.L., L.C. Morgan, and G. Gartlehner, *Semi-automating the manual literature search for systematic reviews increases efficiency.* Health Info Libr J, 2010. **27**(1): p. 22-27.

10. Clark, J.M., et al., *Improving the translation of search strategies using the Polyglot Search Translator: a randomized controlled trial.* J Med Libr Assoc, 2020. **108**(2): p. 195-207.

11. Clark, J., et al., *The Impact of Systematic Review Automation Tools on Methodological Quality and Time Taken to Complete Systematic Review Tasks: Case Study.* JMIR Med Educ, 2021. **7**(2): p. e24418.

12. Cleo, G., et al., *Usability and acceptability of four systematic review automation software packages: a mixed method design.* Syst, 2019. **8**(1): p. 145.

13. Cowie, K., et al., *Web-Based Software Tools for Systematic Literature Review in Medicine: Systematic Search and Feature Analysis.* JMIR Med Inform, 2022. **10**(5): p. e33219.

14. Dechartres, A., et al., *Association between publication characteristics and treatment effect estimates: a meta-epidemiologic study.* Annals of internal medicine, 2018. **169**(6): p. 385-393.

15. dos Reis, A.H.S., et al., *Usefulness of machine learning softwares to screen titles of systematic reviews: a methodological study.* Systematic Reviews, 2023. **12**(1): p. 68.

16. Egger, M., et al., *How important are comprehensive literature searches and the assessment of trial quality in systematic reviews? Empirical study.* Health Technol Assess, 2003. **7**(1): p. 1-76.

17. Ewald, H., et al., *Abbreviated and comprehensive literature searches led to identical or very similar effect estimates: a meta-epidemiological study.* Journal of Clinical Epidemiology, 2020. **128**: p. 1-12.

18. Ewald, H., et al., *Searching two or more databases decreased the risk of missing relevant studies: a metaresearch study.* J Clin Epidemiol, 2022. **149**: p. 154-164.

19. Furuya-Kanamori, L., et al., *Limits in the search date for rapid reviews of diagnostic test accuracy studies.* Res, 2022. **13**: p. 13.

20. Gartlehner, G., et al., *Assessing the accuracy of machine-assisted abstract screening with DistillerAI: a user study.* Syst, 2019. **8**(1): p. 277.

21. Gartlehner, G., et al., *Single-reviewer abstract screening missed 13 percent of relevant studies: a crowd-based, randomized controlled trial.* J Clin Epidemiol, 2020. **121**: p. 20-28.

22. Gates, A., et al., *Performance and usability of machine learning for screening in systematic reviews: a comparative evaluation of three tools.* Syst, 2019. **8**(1): p. 278.

23. Gates, A., et al., *Decoding semi-automated title-abstract screening: findings from a convenience sample of reviews.* Systematic Reviews, 2020. **9**(1).

24. Gates, A., et al., *The semi-automation of title and abstract screening: a retrospective exploration of ways to leverage Abstrackr's relevance predictions in systematic and rapid reviews.* BMC Med Res Methodol, 2020. **20**(1): p. 139.

25. Gates, A., et al., *Creating efficiencies in the extraction of data from randomized trials: a prospective evaluation of a machine learning and text mining tool.* BMC Med Res Methodol, 2021. **21**(1): p. 169.

26. Gates, M., et al., *LOCATE: a prospective evaluation of the value of Leveraging Ongoing Citation Acquisition Techniques for living Evidence syntheses.* Syst, 2021. **10**(1): p. 116.

27. Gates, A., C. Johnson, and L. Hartling, *Technology-assisted title and abstract screening for systematic reviews: a retrospective evaluation of the Abstrackr machine learning tool.* Syst, 2018. **7**(1): p. 45.

28. Gates, A., B. Vandermeer, and L. Hartling, *Technology-assisted risk of bias assessment in systematic reviews: a prospective cross-sectional evaluation of the RobotReviewer machine learning tool.* J Clin Epidemiol, 2018. **96**: p. 54-62.

29. Giummarra, M.J., G. Lau, and B.J. Gabbe, *Evaluation of text mining to reduce screening workload for injury-focused systematic reviews.* Inj Prev, 2020. **26**(1): p. 55-60.

30. Glanville, J.M., et al., *How to identify randomized controlled trials in MEDLINE: ten years on.* J Med Libr Assoc, 2006. **94**(2): p. 130-6.

31. Goossen, K., et al., *Optimal literature search for systematic reviews in surgery.* Langenbecks Arch Surg, 2018. **403**(1): p. 119-129.

32. Guimaraes, N.S., et al., *Deduplicating records in systematic reviews: there are free, accurate automated ways to do so.* J Clin Epidemiol, 2022. **152**: p. 110-115.

33. Haas, Q., et al., *Utilizing Artificial Intelligence to Manage COVID-19 Scientific Evidence Torrent with Risklick AI: A Critical Tool for Pharmacology and Therapy Development.* Pharmacology, 2021. **106**(5-6): p. 244-253.

34. Hair, K., et al., *The Automated Systematic Search Deduplicator (ASySD): a rapid, open-source, interoperable tool to remove duplicate citations in biomedical systematic reviews.* BMC Biology, 2023. **21**(1): p. 189.

35. Hamel, C., et al., *An evaluation of DistillerSR's machine learning-based prioritization tool for title/abstract screening - impact on reviewer-relevant outcomes.* BMC Med Res Methodol, 2020. **20**(1): p. 256.

36. Harrison, H., et al., *Software tools to support title and abstract screening for systematic reviews in healthcare: An evaluation.* BMC Med. Res. Methodol., 2020. **20**(1): p. 7.

37. Hartling, L., et al., *Grey literature in systematic reviews: a cross-sectional study of the contribution of non-English reports, unpublished studies and dissertations to the results of meta-analyses in child-relevant reviews.* BMC Med Res Methodol, 2017. **17**(1): p. 64.

38. Hemens, B.J. and R.B. Haynes, *McMaster Premium LiteratUre Service (PLUS) performed well for identifying new studies for updated Cochrane reviews.* J Clin Epidemiol, 2012. **65**(1): p. 62-72.e1.

39. Hirt, J., et al., *Agreement in Risk of Bias Assessment Between RobotReviewer and Human Reviewers: An Evaluation Study on Randomised Controlled Trials in Nursing-Related Cochrane Reviews.* J Nurs Scholarsh, 2021. **53**(2): p. 246-254.

40. Howard, B.E., et al., *SWIFT-Active Screener: Accelerated document screening through active learning and integrated recall estimation.* Environment International, 2020. **138 (no pagination)**.

41. Hugues, A., et al., *Publication language and the estimate of treatment effects of physical therapy on balance and postural control after stroke in meta-analyses of randomised controlled trials.* Plos one, 2020. **15**(3): p. e0229822.

42. Janssens, A.C. and M. Gwinn, *Novel citation-based search method for scientific literature: application to meta-analyses.* BMC Med Res Methodol, 2015. **15**: p. 84.

43. Janssens, A., et al., *Novel citation-based search method for scientific literature: a validation study.* BMC Med Res Methodol, 2020. **20**(1): p. 25.

44. Jap, J., et al., *Features and functioning of Data Abstraction Assistant, a software application for data abstraction during systematic reviews.* Research Synthesis Methods, 2019. **10**(1): p. 2-14.

45. Jardim, P.S.J., et al., *Automating risk of bias assessment in systematic reviews: a real-time mixed methods comparison of human researchers to a machine learning system.* BMC Med Res Methodol, 2022. **22**(1): p. 167.

46. Jelicic Kadic, A., et al., *Extracting data from figures with software was faster, with higher interrater reliability than manual extraction.* J Clin Epidemiol, 2016. **74**: p. 119-23.

47. Kiritchenko, S., et al., *ExaCT: automatic extraction of clinical trial characteristics from journal publications.* BMC Med Inf Decis Mak, 2010. **10**: p. 56.

48. Kwon, Y., et al., *Identifying and removing duplicate records from systematic review searches.* Journal of the Medical Library Association : JMLA, 2015. **103**(4): p. 184-188.

49. Lee, E., et al., *An optimal search filter for retrieving systematic reviews and meta-analyses.* BMC Med Res Methodol, 2012. **12**: p. 51.

50. Li, T., et al., *A randomized trial provided new evidence on the accuracy and efficiency of traditional vs. electronically annotated abstraction approaches in systematic reviews.* J Clin Epidemiol, 2019. **115**: p. 77-89.

51. Li, J., et al., *Sensitivity and specificity of alternative screening methods for systematic reviews using text mining tools.* J Clin Epidemiol, 2023. **162**: p. 72-80.

52. Marshall, I.J., J. Kuiper, and B.C. Wallace, *RobotReviewer: evaluation of a system for automatically assessing bias in clinical trials.* J Am Med Inform Assoc, 2016. **23**(1): p. 193-201.

53. Marshall, I.J., et al., *Rapid reviews may produce different results to systematic reviews: a meta-epidemiological study.* Journal of clinical epidemiology, 2019. **109**: p. 30-41.

54. Marshall, I.J., et al., *In a pilot study, automated real-time systematic review updates were feasible, accurate, and work-saving.* J Clin Epidemiol, 2023. **153**: p. 26-33.

55. Martyn-St James, M., K. Cooper, and E. Kaltenthaler, *Methods for a rapid systematic review and metaanalysis in evaluating selective serotonin reuptake inhibitors for premature ejaculation.* Evidence & Policy: A Journal of Research, Debate and Practice, 2017. **13**(3): p. 517-538.

56. Mateen, F.J., et al., *Titles versus titles and abstracts for initial screening of articles for systematic reviews.* Clin Epidemiol, 2013. **5**: p. 89-95.

57. McKeown, S. and Z.M. Mir, *Considerations for conducting systematic reviews: evaluating the performance of different methods for de-duplicating references.* Syst, 2021. **10**(1): p. 38.

58. Moher, D., et al., *What contributions do languages other than English make on the results of meta-analyses?* Journal of clinical epidemiology, 2000. **53**(9): p. 964-972.

59. Mortensen, M.L., et al., *An exploration of crowdsourcing citation screening for systematic reviews.* Res, 2017. **8**(3): p. 366-386.

60. Muthu, S., *The efficiency of machine learning-assisted platform for article screening in systematic reviews in orthopaedics.* Int Orthop, 2023. **47**(2): p. 551-556.

61. Nama, N., et al., *A pilot validation study of crowdsourcing systematic reviews: update of a searchable database of pediatric clinical trials of high-dose vitamin D.* Transl, 2017. **6**(1): p. 18-26.

62. Nama, N., et al., *Crowdsourcing the Citation Screening Process for Systematic Reviews: Validation Study.* J Med Internet Res, 2019. **21**(4): p. e12953.

63. Ng, L., et al., *Title and Abstract Screening and Evaluation in Systematic Reviews (TASER): a pilot randomised controlled trial of title and abstract screening by medical students.* Syst Rev, 2014. **3**: p. 121.

64. Noel-Storr, A., et al., *Citation screening using crowdsourcing and machine learning produced accurate results: evaluation of Cochrane's modified Screen4Me service.* J Clin Epidemiol, 2020. **29**: p. 29.

65. Noel-Storr, A., et al., *An evaluation of Cochrane Crowd found that crowdsourcing produced accurate results in identifying randomized trials.* Journal of Clinical Epidemiology, 2021. **133**: p. 130-139.

66. Noel-Storr, A.H., et al., *Crowdsourcing citation-screening in a mixed-studies systematic review: a feasibility study.* BMC Medical Research Methodology, 2021. **21**(1): p. 88.

67. Noel-Storr, A., et al., *Crowdsourcing the identification of studies for COVID-19-related Cochrane Rapid Reviews.* Res Synth Methods, 2022. **13**(5): p. 585-594.

68. Nussbaumer-Streit, B., et al., *Abbreviated literature searches were viable alternatives to comprehensive searches: a meta-epidemiological study.* J Clin Epidemiol, 2018. **102**: p. 1-11.

69. Nussbaumer-Streit, B., et al., *Excluding non-English publications from evidence-syntheses did not change conclusions: a meta-epidemiological study.* J Clin Epidemiol, 2020. **118**: p. 42-54.

70. O'Keefe, H., et al., *Investigation of text-mining methodologies to aid the construction of search strategies in systematic reviews of diagnostic test accuracy-a case study.* Res, 2023. **14**(1): p. 79-98.

71. Olofsson, H., et al., *Can abstract screening workload be reduced using text mining? User experiences of the tool Rayyan.* Res, 2017. **8**(3): p. 275-280.

72. Oude Wolcherink, M.J., et al., *Can artificial intelligence separate the wheat from the chaff in systematic reviews of health economic articles?* Expert Rev Pharmacoecon Outcomes Res, 2023. **23**(9): p. 1049-1056.

73. Ouzzani, M., et al., *Rayyan-a web and mobile app for systematic reviews.* Syst, 2016. **5**(1): p. 210.

74. Pallath, A. and Q. Zhang, *Paperfetcher: A tool to automate handsearching and citation searching for systematic reviews.* Res, 2022. **19**: p. 19.

75. Paynter, R.A., et al., *A prospective comparison of evidence synthesis search strategies developed with and without text-mining tools.* J Clin Epidemiol, 2021. **139**: p. 350-360.

76. Pham, B., et al., *Language of publication restrictions in systematic reviews gave different results depending on whether the intervention was conventional or complementary.* J Clin Epidemiol, 2005. **58**(8): p. 769-76.

77. Pham, M.T., et al., *Implications of applying methodological shortcuts to expedite systematic reviews: three case studies using systematic reviews from agri-food public health.* Res, 2016. **7**(4): p. 433-446.

78. Pianta, M.J., et al., *Crowdsourcing critical appraisal of research evidence (CrowdCARE) was found to be a valid approach to assessing clinical research quality.* J Clin Epidemiol, 2018. **104**: p. 8-14.

79. Pijls, B.G., *Machine Learning assisted systematic reviewing in orthopaedics.* Journal of Orthopaedics, 2024. **48**: p. 103-106.

80. Pradhan, R., et al., *Automatic extraction of quantitative data from ClinicalTrials.gov to conduct meta-analyses.* J Clin Epidemiol, 2019. **105**: p. 92-100.

81. Preston, L., et al., *Improving search efficiency for systematic reviews of diagnostic test accuracy: An exploratory study to assess the viability of limiting to MEDLINE, EMBASE and reference checking.* Systematic Reviews, 2015. **4**(1).

82. Przybyla, P., et al., *Prioritising references for systematic reviews with RobotAnalyst: A user study.* Res, 2018. **9**(3): p. 470-488.

83. Rathbone, J., T. Hoffmann, and P. Glasziou, *Faster title and abstract screening? Evaluating Abstrackr, a semi-automated online screening program for systematic reviewers.* Syst, 2015. **4**: p. 80.

84. Rathbone, J., et al., *Expediting citation screening using PICo-based title-only screening for identifying studies in scoping searches and rapid reviews.* Syst, 2017. **6**(1): p. 233.

85. Reddy, S.M., et al., *Comparison of a traditional systematic review approach with review-of-reviews and semi-automation as strategies to update the evidence.* Syst, 2020. **9**(1): p. 243.

86. Rice, M., et al., *Testing the effectiveness of simplified search strategies for updating systematic reviews.* Journal of Clinical Epidemiology, 2017. **88**: p. 148-153.

87. Royle, P. and N. Waugh, *A simplified search strategy for identifying randomised controlled trials for systematic reviews of health care interventions: a comparison with more exhaustive strategies.* BMC Med Res Methodol, 2005. **5**: p. 23.

88. Sampson, M., et al., *Complementary approaches to searching MEDLINE may be sufficient for updating systematic reviews.* Journal of Clinical Epidemiology, 2016. **78**: p. 108-115.

89. Schopow, N., G. Osterhoff, and D. Baur, *Applications of the Natural Language Processing Tool ChatGPT in Clinical Practice: Comparative Study and Augmented Systematic Review.* JMIR Med Inform, 2023. **11**: p. e48933.

90. Shemilt, I., et al., *Use of cost-effectiveness analysis to compare the efficiency of study identification methods in systematic reviews.* Syst, 2016. **5**(1): p. 140.

91. Stoll, C.R.T., et al., *The value of a second reviewer for study selection in systematic reviews.* Res, 2019. **10**(4): p. 539-545.

92. Šuster, S., T. Baldwin, and K. Verspoor, *Analysis of predictive performance and reliability of classifiers for quality assessment of medical evidence revealed important variation by medical area.* Journal of Clinical Epidemiology, 2023. **159**: p. 58-69.

93. Taylor-Phillips, S., et al., *Comparison of a full systematic review versus rapid review approaches to assess a newborn screening test for tyrosinemia type 1.* Res, 2017. **8**(4): p. 475-484.

94. Thomas, J., et al., *Machine learning reduced workload with minimal risk of missing studies: development and evaluation of a randomized controlled trial classifier for Cochrane Reviews.* J Clin Epidemiol, 2021. **133**: p. 140-151.

95. Tsou, A.Y., et al., *Machine learning for screening prioritization in systematic reviews: comparative performance of Abstrackr and EPPI-Reviewer.* Syst, 2020. **9**(1): p. 73.

96. Valizadeh, A., et al., *Abstract screening using the automated tool Rayyan: results of effectiveness in three diagnostic test accuracy systematic reviews.* BMC Med Res Methodol, 2022. **22**(1): p. 160.

97. van de Schoot, R., et al., *An open source machine learning framework for efficient and transparent systematic reviews.* Nature Machine Intelligence, 2021. **3**(2): p. 125-133.

98. Van Enst, W.A., et al., *Meta-epidemiologic analysis indicates that MEDLINE searches are sufficient for diagnostic test accuracy systematic reviews.* Journal of Clinical Epidemiology, 2014. **67**(11): p. 1192-1199.

99. Waffenschmidt, S., et al., *Increasing the efficiency of study selection for systematic reviews using prioritization tools and a single-screening approach.* Systematic Reviews, 2023. **12**(1): p. 161.

100. Waffenschmidt, S. and C. Guddat, *Searches for randomized controlled trials of drugs in MEDLINE and EMBASE using only generic drug names compared with searches applied in current practice in systematic reviews.* Res, 2015. **6**(2): p. 188-194.

101. Walker, V.R. and A.A. Rooney, *CEC02-02 Automated and Semi-Automated Approaches for Literature Searching, Screening, and Data Extraction for Systematic Reviews in Environmental Health.* Toxicology Letters, 2021. **350(Supplement)**: p. S4.

102. Wang, Z., et al., *Dual computer monitors to increase efficiency of conducting systematic reviews.* J Clin Epidemiol, 2014. **67**(12): p. 1353-1357.

103. Xu, C., et al., *Rapid evidence synthesis approach for limits on the search date: How rapid could it be?* Res, 2022. **13**(1): p. 68-76.
