# Supplementary material for: An exploration of available methods and tools to improve the efficiency of systematic review production: a scoping review
Source: Springer Nature journal article supplement (doi:10.1186/s12874-024-02320-4), 2024-09-18
Supplement: MOESM3 [file 12874_2024_2320_MOESM3_ESM.docx]

| **Review step** | **Method or tool assessed** | **Outcomes** | | | | | |
| --- | --- | --- | --- | --- | --- | --- | --- |
| **Workload saving** | **Time saving** | **Cost saving** | **Impact on results** | **Usability** | **Validity outcomes** |
| **Literature search** |  |  |  |  |  |  |  |
| *Search strategy and database search* | **MeSH on Demand**  Paynter, 2021 [1]  O'Keefe, 2022 [2]  ***Tool*** |  | Time saving of text-mining tools (MeSH on Demand, PubReMiner and YaleMeSH Analyzer) vs. reference standard: 7h (5h [SD=2] vs. 12h [SD=8]) [1] |  |  | Usability was rated as “Not very useful” on a 5-point Likert scale (from extremely useful to least useful) [2] | - Sensitivity:   - Text-mining tools: 84.9% (95% CI; 74.4% to 95.4%)   - Manual searches: 92% (95% CI; 85.0% to 99.0%) [1] - Precision of tool vs. reference standard: 14% vs. 15% [2] |
| **PubReMiner**  Paynter, 2021 [1]  O'Keefe, 2022 [2]  ***Tool*** |  | Time saving of text-mining tools (MeSH on Demand, PubReMiner and YaleMeSH Analyzer): 7h (5h [SD=2] vs. 12h [SD=8]) [1] |  |  | Usability was rated as “Useful” on a 5-point Likert scale (from extremely useful to least useful) [2] | - Sensitivity:   - Text-mining tools: 84.9% (95% CI; 74.4% to 95.4%)   - Manual searches: 92.0% (95% CI; 85.0% to 99.0%) [1] - Precision of tool vs. reference standard: 11% vs. 15% [2] |
| **Polyglot Search Translator (PST)**  Clark, 2020 [3]  ***Tool*** |  | Time saving (mean): 14min (31min [SD= 39] vs. 45min [SD=59]) [3] |  |  |  | - Number of errors per translation (mean):   - PST: 8.6 (SD=9)   - Manual searches: 14.6 (SD=26)   [3] |
| **Risklick search platform**  Haas, 2021 [4]  ***Tool*** |  |  |  |  |  | Search performance for Clinical Trials:   - Recall: 99.3% - Precision: 96.0%   Search performance for COVID-19-Related Publications:   - Recall: 86.7% - Precision: 94.4% [4] |
| **Yale MeSH Analyzer**  [1]  O'Keefe, 2022 [2]  ***Tool*** |  | Time saving of text-mining tools (MeSH on Demand, PubReMiner and YaleMeSH Analyzer): 7h (5h [SD=2] vs. 12h [SD=8]) [1] |  |  | Usability was rated as “Extremely useful” on a 5-point Likert scale (from extremely useful to least useful) [2] | - Sensitivity:   - Text-mining tools: 84.9% (95% CI; 74.4% to 95.4%)   - Manual searches: 92.0% (95% CI; 85.0% to 99.0%) [1] - Precision of tool vs. reference standard: 11% vs. 15% [2] |
| **Abbreviated search strategies for study type, topic or search date**  ***Method***  *For RCTs*  Glanville, 2006 [5]  Royle & Waugh, 2005 [6]  *For drug-related RCTs*  Waffenschmidt & Guddat, 2015 [7]  *For SRs and meta-analyses (MAs)*  Lee, 2012 [8]  *For the recent 10 to 20 years*  Furuya-Kanamori, 2022 [9]  Xu, 2021 [10] | *For RCTs*   - Workload saving: 16% less references retrieved [6]   *For the recent 10 to 20 years*   - Workload saving (median):   - recent 20 years: 22.9% (12.6%-34.9%)   - recent 15 years: 33.6% (21.7%-44.4%)   - recent 10 years: 45.1% (33.8%-57.8%) 2021 [10] |  |  | *For RCTs*   - Significant differences to a small proportion of the total outcomes in only five reviews - No important differences in conclusions [6]   *For the recent 10 to 20 years*   - Limit to recent 20 years: 88.2% of MAs minimally changed (<5%) - Limit to recent 15 years: 78.4% of MAs minimally changed (<5%) - Limit to recent 10 years: 61.4% of MAs minimally changed (<5%) 2021 [10] - Limit to recent 10 to 15 years: >75% and 80% of MAs minimally changed (<5%) [9] |  | *For RCTs*   - Sensitivity:94.0%. [6] - Sensitivity: 99.5% [5] - Precision: 19.3% [5]   *For drug-related RCTs*   - Sensitivity:   - MEDLINE: 99.3% (95% CI; 98.9% to 99.7%)   - EMBASE: 99.6% (95% CI; 99.2% to 100%) [7]   *For SRs and meta-analyses*   - Sensitivity:   - MEDLINE: 89.9%   - EMBASE: 87.9%   - CINAHL: 89.9% [8] - Specificity:   - MEDLINE: 98.9%   - EMBASE: 98.2%   CINAHL: 97.6% [8]  *For the recent 10 to 15 years*   - Proportion of missed references: 21% to 35% - Unable to conduct MAs: 4% to 10% [9] |
| **Citation based searching**  Belter, 2016 [11]  Janssens, 2015 [12]  Janssens, 2020 [13]  ***Method*** | Workload saving:   - 59.5% less references retrieved [11] - 50.0%-89.0% less references retrieved [12] |  |  |  |  | Proportion of relevant studies retrieved:   - 74.5% [11] - across different sets (range): 79.0%-82.0% [12] - across different sets (median): 75.0% [13] |
| **Restricted database searching**  Beyer, 2013 [14]  Ewald, 2020 [15]  Ewald, 2022 [16]  Goossen, 2018 [17]  Nussbaumer-Streit, 2018 [18]  Preston, 2015 [19]  Van Enst, 2014 [20]  ***Method*** | *≥ 2 databases*  MEDLINE, EMBASE plus reference list checking:   - Workload saving: 24% less references searching [19] |  |  | *≥ 2 databases*  2 databases or 1 database plus reference list checking:   - Change of conclusion in other direction: 2% (95% CI; 0% to 9%) [18]   MEDLINE, Embase, CENTRAL plus reference list checking:   - Proportion of change in conclusions: 8% (95% CI; 3% to 18%) [18]   Combination of 2 databases (MEDLINE/EMBASE/Central) (plus reference list checking):   - ROR (mean range): 0.98-1.0 (range: 0.55-1.23) [15]   Combination of 2 databases:  Same conclusion, same certainty   - MEDLINE+Embase: 50/60 reviews - MEDLINE+CENTRAL: 53/60 reviews - CENTRAL+Embase: 50/60 reviews [16]   *Single databases*  Proportion of change in conclusions:   - MEDLINE: 20% (95% CI; 11% to 32%) - Embase: 27% (95% CI; 16% to 40%) - CENTRAL: 22% (95% CI; 12% to 34%) [18]   MEDLINE vs. all studies:   - RDOR: 1.04 (95% CI; 0.95 to 1.15) compared to - Difference in sensitivity: -0.08% (95% CI; 1% to 1%) - Difference in specificity: -0.1% (95% CI; 0.8% to 1%) [20]   MEDLINE/Embase/CENTRAL:   - ROR: 0.98-1.0 (0.42-1.42) [15]   Same conclusion, same certainty:   - MEDLINE: 48/60 reviews - Embase: 44/60 reviews - CENTRAL: 47/60 of reviews [16] |  | *≥ 2 databases*  MEDLINE, Embase plus reference list checking:   - Retrieved studies: 92.7% (280/302) [19]   MEDLINE, CENTRAL plus hand searching:   - Recall: 98.6% for RCTs - Plus Embase: Recall: 99.3% [17]   MEDLINE and Web of Science:   - Recall: 99.5% for NRS [17]   Various databases:   - To retrieve all relevant studies: ≥ 2 databases (Cochrane Central Register of Controlled Trials (CENTRAL) and Science Citation Index (SCI); or CENTRAL, MEDLINE and PreMEDLINE) and reference list checking [14]   ≥ 2 databases (MEDLINE, Embase, CENTRAL):   - Recall: ≥ 87.9% [16]   *Single databases*  Various single databases:   - Recall (median) across single databases: 23.0% (range: 0.0%-87.0%) [14] - Precision (median) across single databases: 1.0% (range 0.0%-14.3% [14]   CENTRAL   - Recall: 88.4% - Precision: 8.3% for RCTs [17]   MEDLINE   - Recall: 92.6% - Precision: 5.2% for NRS [17] |
| **Restricted language searching with excluding non-English articles**  Dechartres, 2018 [21]  Egger, 2003 [22]  Hartling, 2017 [23]  Hugues, 2020 [24]  Moher, 2000 [25]  Nussbaumer-Streit, 2020 [26]  Pham, 2005 [27]  ***Method*** |  |  |  | Changes in statistical significance of MAs:   - 12.2% of MAs (18/147) [21] - 11.6% of MAs (17/147) became nonsignificant [21] - 11% (1/9) of MAs, none became nonsignificant [24] - 6.7% (1/15) of MAs changed and became nonsignificant [23] - 3.3% (2/59) of MAs [26] - 1.7% (1/59) of MAs became nonsignificant [26] - No changes in MAs [22, 25] - No change in the results of conventional medicine SRs [27]   Change of effect estimates:   - 58% (29/50) of MAs changed less than 5% [22] - Random effects ROR: 1.63 (95% CI; 1.03 to 2.60) for complementary and alternative medicine SRs [27] - 60% of MAs (9/15) change of effect estimates was negligible or small [23] - 26.7% of MAs (4/15) change of effect estimates was more than 20% [23] - 13.3% (2/15) of MAs unable to conduct [23]   Change in conclusions:   - 0.0% of conclusions changed (95% CI; 0.0% to 0.6%) [26] - No changes in conclusions [23] |  |  |
| *Deduplication* | **ASySD**  Hair, 2023 (fully automated) [28]  ***Tool*** |  |  |  |  |  | - Sensitivity (range): 95%-100% - Specificity (range): >99% - Precision (range): 99%-100% [28] |
| **EBSCO**  Kwon, 2015 [29]  ***Tool*** |  | - Time saving: 4h42min (3 min vs. 4h45min) [29] |  |  |  | - False negatives: 96; false positives: 43 [29] |
| **EndNote**  Guimarães, 2022 [30]  Hair, 2023 (fully automated) [28]  Kwon, 2015 [29]  McKeown, 2021 [31]  ***Tool*** |  | - Time saving: 4h42min (3 min vs. 4h45min) [29] |  |  |  | - Sensitivity: 57% (95% CI; 54% to 60%) [31] - Sensitivity: 73% (95% CI; 65% to 80%) [30] - Sensitivity: 74%-97% (Hair, 2023) - Specificity: 89% (95% CI; 88% to 90%) [31] - Specificity: 99% (95% CI; 99% to 99%) [30] - Specificity: 100% (Hair, 2023) - Accuracy: 76% (95% CI; 75% to 78%) [31] - Accuracy: 86% [30] - Precision: 100% (Hair, 2023) - False negatives: 258; false positives: 6 [29] |
| **Covidence**  McKeown, 2021 (fully automated) [31]  ***Tool*** |  |  |  |  |  | - Sensitivity: 90% (95% CI; 89% to 92%) - Specificity: 100% (95% CI; 100% to 100%) - Accuracy: 96% (95% CI; 95% to 97%) [31] |
| **Deduklick**  Borissov, 2022 [32]  ***Tool*** |  |  |  |  |  | - Recall: 99.5% - Precision: 100% [32] |
| **Mendeley**  Guimarães, 2022 [30]  Kwon, 2015 [29]  McKeown, 2021 [31]  ***Tool*** |  | - Time saving: 4h40min; 5 min vs. 4h45min with reference standard [29] |  |  |  | - Sensitivity: 84% (95% CI; 82% to 86%) [31] - Sensitivity: 93% (95% CI; 88% to 97%) [30] - Specificity: 99% (95% CI; 99% to 100%) [31] - Specificity:100% (95% CI; 100% to 100%) [30] - Accuracy: 93% (95% CI; 92% to 94%) (McKeown) - Accuracy: 96% [30] - False negatives: 36; false positives: 4 [29] |
| **OVID**  Kwon, 2015 [29]  McKeown, 2021 (fully automated) [31]  ***Tool*** |  | - Time saving: 4h42min; 3 min vs. 4h45min with reference standard [29] |  |  |  | - False negatives: 91; false positives: 0 [29] - Sensitivity: 93% [31] - Specificity: 100% [31] - Accuracy: 97% [31] |
| **Rayyan**  Guimarães, 2022 [30]  McKeown, 2021 [31]  ***Tool*** |  |  |  |  |  | - Sensitivity: 96% (95% CI; 95% to 97%) [31] - Sensitivity: 98% (95% CI; 94% to 100%) [30] - Specificity: 97% (95% CI; 96% to 98%) [31] - Specificity: 96% (95% CI; 96% to 97%) [30] - Accuracy: 97% (95% CI; 96% to 97%) (McKeown) - Accuracy: 97% [30, 31] |
| **RefWorks**  Kwon, 2015 [29]  ***Tool*** |  | - Time saving: 4h35min; 10 min vs. 4h45min with reference standard [29] |  |  |  | - False negatives: 94; false positives: 3 [29] |
| **Systematic Review Accelerator (SRA)-Deduplicator**  Cowie, 2022 [33]  Guimarães, 2022 [30]  Hair, 2023 [28]  ***Tool*** |  |  |  |  | - Feature score (screening, extraction, output, administration, access): 9/30 [33] - Collaboration with other users not possible [33] | - Sensitivity: 90% (95% CI; 84% to 95%) [30] - Sensitivity (range): 33%-93% [28] - Specificity: 100% (95% CI; 100% to 100%) [30] - Specificity (range): 88%-98% [28] - Accuracy: 95% [30] - Precision (range): 81%-96% [28] |
| **Zotero**  Guimarães, 2022 [30]  McKeown, 2021 [31]  ***Tool*** |  |  |  |  |  | - Sensitivity: 52% (95% CI; 49% to 54%) [31] - Sensitivity: 74% (95% CI; 66% to 81%) [30] - Specificity: 99% (95% CI; 99% to 99%) [31] - Specificity: 99% (95% CI; 99% to 99%) [30, 31] - Accuracy: 80% (95% CI; 79% to 82%) [31] - Accuracy: 86% [30] |
| *Additional search* | **Paperfetcher**  Pallath, 2022 [34]  ***Tool*** |  | - Time saving: 88%-92% (1min versus 8-12min) [34] |  |  | Easy to use graphical interface [34] |  |
| **SCOPUS approach**  Chapman, 2010 [35]  ***Method*** |  | - Time saving: 62,5% (3h versus 8h) [35] |  |  |  | - All relevant studies retrieved - 6 additional references retrieved [35] |
| *Update search* | **RobotReviewer LIVE**  Cowie, 2022 [33]  Marshall, 2023 [36]  ***Tool*** |  |  |  |  | - Tool is limited to searches in PubMed/MEDLINE [36] - Tool considers only RCTs [36] - Feature score (screening, extraction, output, administration, access): 8/30 [33] | - Precision: 55% - Recall: 100% [36] |
| **Clinical Query search combined with PubMed related articles search**  Rice, 2017 [37]  Sampson, 2016 [38]  ***Method*** |  |  |  |  |  | Clinical Query search plus PubMed related articles search:   - Recall: 91% [38] - Sensitivity (median): 83.3% [37] - Precision: 1.53% [37]   Clinical Query search:   - Recall: 69% [38]   Related articles search:   - Recall: 66% [38] |
| **Clinical Query search in MEDLINE and EMBASE**  Hemens, 2012 [39]  ***Method*** |  |  |  |  |  | MEDLINE:   - Relative recall: 89.0% - Sensitivity for RCTs: 99.4%   EMBASE:   - Relative recall: 84.0% - Sensitivity for RCTs: 97.6% [39] |
| **McMaster Premium LiteratUre Service (PLUS)**  Hemens, 2012 [39]  ***Method*** |  |  |  | Change of effect estimates:   - Ratio of OR between PLUS and non-PLUS trials: 0.99 (95% CI; 0.87 to 1.14) [39] |  | - Relative recall: 23% - Retrieved studies: 100% of new studies identified for 14.9% (13/87) of reviews [39] |
| **PubMed Similar Articles Search**  Gates, 2021b [40]  ***Method*** |  | Time saving: 24% (9.4 h vs. 12.4 h) [40] |  |  |  | - Sensitivity: 25% - Precision: 22% [40] |
| **Scopus Citation Tracking**  Gates, 2021b [40]  ***Method*** |  | Time saving: 58% (5.2 h vs. 12.4 h) [40] |  |  |  | - Sensitivity: 25% - Precision: 41% [40] |
| **Study selection** |  |  |  |  |  |  |  |
| *Title and abstract selection* | **AbstrackR (semi-automated, fully-automated)**  *Semi-automated:*  Cowie, 2022 [33]  dos Reis, 2023 [41]  Gates, 2019 [42]  Gates, 2020a [43]  Gates, 2020b [44]  Gates, Johnson & Hartling; 2018 [45]  Giummarra, 2020 [46]  Harrison, 2020 [47]  Li, 2023 [48]  Rathbone, 2015 [49]  Reddy, 2020 [50]  Tsou, 2020 [51]  *Fully-automated:*  Gates, 2019 [42]  ***Tool*** | *Semi-automated:*   - Workload saving: 82.7% [46] - Workload saving (range): 9%-57% [49] - Workload saving: 76% [50] - Potential workload saving (range): 4%-49% [51] - Workload saving (range): 15%-45% [44] - Workload saving (median): 35% (IQR: 30%-43%) [43] - Workload saving (median): 67.2% (range 9.5%-88.4%) [45] - Workload saving: 97% [41]   *Fully-automated:*   - Workload saving (median): 90% (range: 82%-93%) [42] | Semi-automated:   - Estimated time saving: 36.6% (77.3h vs. 122h) [46] - Estimated time savings: 26h (range: 9h-42h) [43] - Time saving: 1.7 days [41] - Time saving: 377 min [48]   Fully-automated:   - Time saving (median): 154h (range: 91h-183h) [42] |  |  | - Simple option for basic screening [47] - Good for collaborating [47] - Poor quality user interface [47] - Feature score (screening, extraction, output, administration, access): 15/30 [33] - User experience score 33.8/40 [41] | *Semi-automated:*   - Sensitivity: 29.7% [46] - Sensitivity (range): > 75% [45] - Sensitivity (30% of total citations included): 77% [50] - Sensitivity (80% of total citations included): 90% [50] - Sensitivity: 60% [41] - Sensitivity (mean): 90.9% [48] - Specificity: 83.7% [46] - Specificity (range): 69%-90% (except one project which was 19%) [45] - Specificity: 99% [41] - Specificity(mean): 97.7% [48] - Precision (range): 16.8%-45.5% [49] - Precision: 14.5% [46] - Precision: 73% (dos Reis, 2023) - False negative rate: 39% [41] - Prioritization Accuracy for inclusion for full-text screening (range): 51.5%-99.3% [51] - Proportion of missed references: 1% [43] - Proportion of missed references (range): 0%-44% [44] - Proportion of missed references (range): 0.0%-0.13% [49] - Proportion of missed references: 1.8% [46] - Proportion of missed references (median): 4.2% (range: 0-12.2%) [45] - Proportion of missed references: 0.9% [41]   *Fully-automated:*   - Proportion of missed references (median): 5% (range: 0%-28%) [42] |
| **ASReview (semi-automated)**  Muthu, 2022 [52]  Oude Wolcherink, 2023 [53]  Pijls, 2024 [54]  Van de Schoot, 2021 [55]  ***Tool*** | - WSS@95% (mean): 83%, (range: 67-92%) [55] - WSS@100% (range): 38%-93% [55] - WSS@95% (range): 38%-78% [52] - WSS@95% (range): 50%-72% [54] - WSS@100% (range): 37%-72% [54] | - Potential time saving (median) (reference standard: included full texts): 6.3h (range 4.6h-7.9h) - Potential time saving (median) (reference standard: final inclusions): 57.6h (range 55.6h-58.4h) [53] |  |  | - Accessible, clear, fun, easy to use (also for unexperienced users) [55] - Usability score: 7.9/10 (SD 0.9) (Van de Schoot, 2021) | - RRF10%: 70%-100% [55] - RRF30%: 64%-97% [52] - RFF10%: 58%-79% [54] - Sensitivity (reference included full texts): (range): 52.9-85% [53] - Sensitivity (reference final includes) (range): 91.8-100% [53] |
| **ChatGPT**  Schopow, 2023 [56]  ***Tool*** |  |  |  |  |  | *Title screening:*   - Sensitivity: 100% - Specificity: 50.0%   *Abstract screening:*   - Sensitivity: 100% - Specificity: 41.2% [56] |
| **Colandr**  dos Reis, 2023 [41]  ***Tool*** | - Workload saving: 97% [41] | Semi-automated:   - Time saving: 1.7 days [41] |  |  | - User experience score 16.25/40 [41] | - Sensitivity: 65% - Specificity: 99% - Precision: 71% - False negative rate: 34% - Proportion of missed references: 0.8% [41] |
| **Covidence**  Cleo, 2019 [57]  Cowie, 2022 [33]  Harrison, 2020 [47]  ***Tool*** |  |  |  |  | - Overall usability score: 23/30 [57] - Easy to learn: 8/10 [57] - General usability: 9/10 [57] - Response time: 6/10 [57] - Easy to use; good user interface; many export formats; support of PRISMA flow diagram [47] - Issues help section [47] - Feature score (screening, extraction, output, administration, access): 20/30 [33] |  |
| **DistillerSR (semi-automated, fully-automated)**  Cowie, 2022 [33]  Gartlehner, 2019 [58]  Gates, 2019 [42]  Hamel, 2020 [59]  ***Tool*** | Semi-automated:   - Workload saving (median): 93% [58] - WSS@95%: 52.9% [59]   Fully-automated:   - Workload saving (median): 98% [58] - Workload saving (median): 99% (range: 98%-99%) (Gates, 2019) | Semi-automated:   - Time saving at @recall95%: 29.8h (IQR: 28.1h-74.7h) [59]   Fully-automated:   - Time saving (median): 185h (range: 95h-201h) [42] |  | Semi-automated:   - None of the missed studies were a final include in the systematic review [59] | - System Usability Score: 64, meaning marginal usability [42] - Feature score (screening, extraction, output, administration, access): 26/30 [33] | Semi-automated:   - Sensitivity: 78% (95% CI; 66% to 90%) [58] - Specificity: 95% (95% CI; 92% to 97%) [58] - False negatives (median): 4.57% [59]   Fully-automated:   - Sensitivity: 14% (95% CI; 0% to 31%) [58] - Specificity: 98% (95% CI; 97% to 100%) [58] - Proportion of missed references (median): 97% (95% CI; 96% to 100%) [42] |
| **EPPI-reviewer (probability ranking)**  Cowie, 2022 [33]  Harrison, 2020 [47]  Tsou, 2020 [51]  Waffenschmidt, 2023 [60]  ***Tool*** | - Potential workload saving (range): 9%-60% [51] - WSS@100% (range): 39.9%-98.8% across reviews [51] |  |  |  | - Useful for large or complex projects; complex to use [47] - Feature score (screening, extraction, output, administration, access): 24/30 [33] | Proportion of relevant references identified:   - STOP after 25%: 76% (range 14%-100%) - STOP after 50%: 88% (range: 43%-100%) - STOP after 75%: 93% (range: 71%-100%) [60] |
| **Rayyan (semi-automated)**  Cleo, 2019 [57]  Cowie, 2022 [33]  dos Reis, 2023 [41]  Harrison, 2020 [47]  Li, 2023 [48]  Olofsson, 2017 [61]  Ouzanni, 2016 [62]  Valizadeh, 2022 [63]  Waffenschmidt, 2023 [60]  ***Tool*** | - WSS@95%: 49%±18% [62] - Workload saving: 97% [41] | - Time saving:40% [62] - Time saving: 1.7 days [41] - Time saving: 268 min [48] |  |  | - Usability score: 25/30 [57] - Score: 4.5/5 [61] - Easy to learn: 10/10 [57] - General usability: 8/10 [57] - Response time: 7/10 [57] - Feature score (screening, extraction, output, administration, access): 18/30 [33] - Simple and easy to use [47, 61, 62] - Easy to learn, readily navigable, and intuitive [61, 62] - Helps to keep track of progress [61] - Most preferred features were the labelling, collaboration and blinding functions Ouzzani, 2016 #251;Olofsson, 2017 #255} - Too much content on side panel [47] - User experience score: 35/40 [41] | *Semi-automated abstract screening*   - Sensitivity (range): 97%-99% [63] - Specificity (range): 19%-58% [63] - After screening 50% of abstracts: 96%-100% of inclusions were identified [61] - After screening 60% of abstracts: 94%-100% of relevant studies were identified [63] - Sensitivity: 78% [41] - Sensitivity (mean): 90.9% [48] - Specificity: 99% (dos Reis, 2023) - Specificity (mean): 96.9% [48] - Precision: 71% (dos Reis, 2023) - Proportion of relevant studies identified:   - STOP after 25%: 53% (range: 0%-83%)   - STOP after 50%: 66% (range: 0%-100%)   - STOP after 75%: 75% (range: 0%-100%) [60] - Proportion of missed references: 0.5% [41]   False negative rate: 21% [41]  *Semi-automated for identifying relevant full-texts:*   - Sensitivity (range): 97%-99% [63] - Specificity (range): 3%-5% [63] - After screening 60% of full-texts, 87%-100% of relevant studies were identified [63] |
| **RCT classifier**  Thomas, 2020 [64]  ***Tool*** |  |  |  |  |  | - Precision: 8% - Recall: 99% - Proportion of missed references: 0.5% [64] |
| **Research screener (semi-automated)**  Chai, 2021 [65]  ***Tool*** | - WSS@95%: 89.1% (range: 68%-96%) [65] | - Time saving: 12.5 days [65] | Financial saving: 2444 USD [65] |  |  |  |
| **RobotAnalyst (semi-automated)**  Cleo, 2019 [57]  Cowie, 2022 [33]  Gates, 2019 [42]  Przybyla, 2018 [66]  Reddy, 2020 [50]  ***Tool*** | - WSS@95%: 42.97% (range: 6.89%-70.74%) [66] - Workload saving (median): 85% (range: 84%-88%) [42] - Workload saving @30%, 40%, and 50% inclusion probability: 1%, 7% and 26% [50] | - Time saving @30%, 40%, and 50% inclusion probability: 11min, 110min, and 414min respectively [50] - Time saving (median): 157h (range: 86h-172h) [42] |  |  | - Usability score: 22/30 [57] - Easy to learn: 9/10 [57] - General usability: 8/10 [57] - Response time: 5/10 [57] - Collaboration with other users not possible [33] | - Proportion of missed references (median): 70% (23%-100%) [42] - @30% inclusion probability   - Sensitivity: 100%   - Specificity: 30% [50] - @40% inclusion probability   - Sensitivity: 93%   - Specificity: 36% [50] - @50% inclusion probability:   - Sensitivity: 74%   - Specificity: 55% [50] |
| **SRA-Helper for Endnote**  Cleo, 2019 [57]  ***Tool*** |  |  |  |  | - Usability score: 28/30 - Easy to learn: 10/10 - General usability: 8/10 - Response time: 10/10 [57] |  |
| **SWIFT active screener (semi-automated)**  Cowie, 2022 [33]  Howard, 2020 [67]  ***Tool*** | - WSS@95: 34% [67] |  |  |  | - Feature score (screening, extraction, output, administration, access): 16/30 [33] | - Recall (median): 99% [67] |
| **SWIFT-review**  Li, 2023 [48]  ***Tool*** |  | - Time saving: 396 min [48] |  |  |  | - Sensitivity (mean): 90.9% - Specificity (mean): 97.9% [48] |
| **Crowdsourcing (+ Screen4Me, Cochrane Crowd (incl. RCT classifier), Amazon Mechanical Turk, EndNote, paper, Regroup and Screen2Go)**  Mortensen, 2017 [68]  Nama, 2017 [69]  Ng, 2014 [70]  Noel-Storr 2020 [71], 2021a [72], 2021b [73], 2022 [74]  ***Method*** | Crowd+EndNote, paper, Regroup and Screen2Go:   - Workload saving (range): 89.2% to 94.7% [70]   Crowd+Screen4Me:  Workload saving: 81.2% [71] | Crowd+ Cochrane Crowd:   - Time saving: 377h (33h vs. 410h) [73] | Crowd+Amazon Mechanical Turk:  Cost saving (mean): 82% [68] |  |  | Crowd+Amazon Mechanical Turk:   - Correct inclusions (range): 95%-99% - Correct exclusions (range):68%-82% [68]   Crowd+individual online platform:   - Sensitivity: 100% (95% CI; 88 to 100%) - Specificity: 99% (95% CI; 96 to100%) [69]   Crowd+EndNote, paper, Regroup and Screen2Go:   - Sensitivity (range): 46.7%-66.7% - Specificity (range): 93.2%-97.4% [70]   Crowd+Screen4Me+Cochrane Crowd:   - Sensitivity: 100% [71] - Specificity: 80.7% [71]   Crowd+Cochrane Crowd (incl. RCT classifier):   - Sensitivity: 99.1% [72] - Sensitivity: 84% [74] - Sensitivity (range): 94.4%-100.0% [74] - Specificity: 99% [72] - Specificity: 98.6% [74] - Specificity (range): 70.5%-88.7% [74] |
| **Dual computer monitors**  Wang, 2014 [75]  ***Method*** |  | - Time saving: no significant difference in time found [75] |  |  |  |  |
| **Single reviewer screening**  Gartlehner, 2020 [76]  Pham, 2016 [27]  Shemilt, 2016 [77]  Stoll, 2019 [78]  ***Method*** |  | - Time saving: 50% (208h vs. 416h) [77] | Cost saving: 58% (12103 versus 29321 pounds) [77] | Change of conclusions:   - Less experienced researchers: findings would have changed substantially - Experienced reviewer: missing studies had no or negligible impact on the findings [27] |  | Single screening:   - Proportion of missed references (mean): 19% (range: 0%-58%). [27] - Proportion of missed references (range): 6.6% to 9.1% [78] - Sensitivity: 86.6% (95% CI; 80.6% to 91.2%) [76] - Specificity: 97.5% (95% CI; 95.1% to 98.8%) [76] |
| **Review of reviews**  Reddy, 2020 [50]  ***Method*** | - Workload saving: 4% [50] | - Time saving: 25.5 h [50] |  |  |  | Sensitivity: 56% [50] |
| **Title-first screening**  Mateen, 2013 [79]  ***Method*** |  |  |  |  |  | - Precision: 3.2% - Recall: 100% - F1-score: 0.0619 - Interreviewer agreement: 89-94% (κ=0.54) [79] |
| **PICO-based title-only screening**  Rathbone, 2017 [80]  ***Method*** | - Workload saving (median): 53% (range: 11%-78%) [80] |  |  |  |  | - Recall:   - 100% in 9/10 reviews   - 67% in 1/10 reviews [80] |
| Full-text selection | **Crowdsourcing (+CrowdScreenSR, RCT-classifier)**  Nama, 2019 [81]  ***Method*** | - 100% crowd agreement (median 7 assessments):   - Full-texts excluded by crowd: 68.3% (95% CI 66.4% to 70.1%) [81] |  |  |  |  | - 100% crowd agreement (median 7 assessments):   - Sensitivity: 100% (95% CI 97.9-100) [81] - Proportion of relevant full-texts identified: 83.5% [81] |
| **Dual computer monitors**  Wang, 2014 [75]  ***Method*** |  | - Time saving: no significant difference [75] |  |  |  |  |
| **Single reviewer screening**  Shemilt, 2016 [77]  Stoll, 2019 [78]  ***Method*** |  | - Time saving: 4.2% (23960 versus 25000 min) [77] | Cost saving: 4.2% (28153 versus 29375 pounds) [77] |  |  | Single screening:   - Proportion of missed references: 6.6% to 11.9% [78] |
| **Data extraction** | **ChatGPT**  Schopow, 2023 [56]  ***Tool*** |  |  |  |  |  | Agreement between ChatGPT and two human reviewers:   - Article’s language: κ=1 - Targeted disease: κ=1 - NLP model: κ=0.95 - Sample size: κ=0.83 - Performance parameters: κ=0.85 - Study design: κ=0.79 - Clinical task: κ=0.58 - Clinical implementation: κ=0.34 [56] |
| **Data Abstraction Assistant (DAA)**  Cowie, 2022 [33]  Jap, 2019 [82]  Li, 2019 [83]  ***Tool*** |  | - Time saving: 25.6% (128 versus 172 min) [83] |  |  | - Very/somewhat easy to use (83%) [82] - Likely to use in future (71%) [82] - Would recommend to others (87%) [82] - Feature score (screening, extraction, output, administration, access): 10/30 [33] | - Proportion of errors: 17% (range: 6-33%) - OR for errors: 1.12 (95% CI; 1.03 to 1.22) [83] |
| **Dextr**  Walker, 2022 [84]  ***Tool*** |  | - Time saving: 53% (7.3 vs. 15.5 min) [84] |  |  | - Flexible, easy to use user interface - Project management features - Flexible data extraction form   [84] | - Precision: 96.0% - Recall: 91.8% [84] |
| **ExaCT**  Gates, 2021 [85]  Kiritchenko, 2010 [86]  Pradhan, 2019 [87]  ***Tool*** |  | - Time saving: 23% [86] - Time saving: 60% [87] - Time saving: 17% [85] |  | - 87% of the data elements extracted using EXACT matched those extracted manually from the journal articles which altered quality of results (Pradhan, 2019 ) |  | - Precision: 93% - Recall: 91% [86] - Accuracy: 100% of the data elements extracted using EXACT matched the data posted at ClinicalTrials.gov. [87] - Accuracy: 91% of data was correctly identified as reported or not reported [85] |
| **Plot Digitizer**  Jelicic Kadic, 2016 [88]  ***Tool*** |  | - Time saving: 47% [88] |  |  |  | Agreement between two reviewers with:   - - manual extraction: 51%   - tool extraction: 53.5% [88]   Agreement between reviewers and original data from study authors with:   - - manual extraction (Rev. 1, Rev. 2): 66%, 69%   - tool extraction (Rev. 1, Rev. 2): 73%, 75% [88] |
| **Dual computer monitors**  Wang, 2014 [75]  ***Method*** |  | - Time saving: 23.8 min per article (95% CI; -46.03 to -1.58) [75] |  |  |  |  |
| **Single data extraction**  Buscemi, 2006 [89]  Li, 2019 *(plus verification)* [83]  ***Method*** |  | - Time saving: 36.1% [89] - Time saving: 37.8% (107 versus 172 min) [83] |  | - Similar pooled estimates as the reference standard [89] |  | - Proportion of errors: 17.7% - Proportion of errors: 16.0% (range: 2-33% [83] - Overall rate of disagreement: 28.0% (95% CI; 25.4 to 30.7) [89] - Relative difference in errors: 21.7% [89] - OR for errors: 1.08 (95% CI; 0.99 to 1.17) [83] |
| **Critical appraisal** | **RobotReviewer**  Armijo-Olivo et al., 2020 [90]  Arno, 2022 [91]  Cowie, 2022 [33]  Gates, Vandermeer & Hartling; 2018 [92]  Hirt, 2021 [93]  Jardim, 2022 [94]  Marshall, 2016 [95]  Suster, 2023 [96]  ***Tool*** |  | - Time saving: 1.40 min (8.97 min versus 10.36) [91] |  |  | - Acceptable, useful tool [94] - Less experienced reviewers were generally more positive, and they saw more benefits and were able to use the tool more flexibly than experienced reviewers [94] - Experienced reviewers valued the transparency of providing the text snippets with the assessment, which helps in assessing risk of bias [94] - Reviewers positioned human input and human-to-human interaction as superior to even compared semi-automation with tool [94] - Feature score (screening, extraction, output, administration, access): 8/30 (Cowie) - Collaboration with other users not possible [33] | - Sensitivity across six RoB domains (range): 0.20-0.76 [92] - Sensitivity across four RoB domains (range): 0.44-0.88 (Hirt) - Sensitivity detecting low RoB for overall RoB: 0.0 (95% CI; 0.0 to 0.60) [90] - Sensitivity detecting high RoB for overall RoB: 0.16 (95% CI; 0.1 to 0.25) [90] - Sensitivity across four RoB domains (range): 0.48 to 0.95 [93] - Specificity across six RoB domains: 0.61-0.95 [92] - Specificity detecting low RoB for overall RoB: 0.98 (95% CI; 0.96 to 0.99) [90] - Specificity detecting high RoB for overall RoB: 0.96 (95% CI; 0.94, 0.98) [90] - Interrater reliability across four RoB domains: κ=0.12-0.61 (Armijo-Olivo) - Interrater reliability for overall RoB: κ=0.15 (95% CI; 0.13 to 0.19) [90] - Reliability for overall RoB: 0.34 (95% CI; 0.25 to 0.44) [92] - Accuracy across four RoB domains: 62% to 74% [96] - Overall accuracy: 71.0% versus 78.3% with Cochrane standard [95] - Overall accuracy: risk difference, -0.014 (95% CI: -0.09 to 0.07) [91] - Acceptance of assessments by humans: 83% of RobotReviewer`s assessments versus 81% of humans assessment [94] |
| **Crowdsourcing with CrowdCARE**  Pianta, 2018 [97]  ***Method*** |  |  |  |  |  | - Correlation between experts and crowd: r2 = 0.89 - Concordance between experts and crowd: κ = 0.67 (95% CI; 0.61 to 0.73) [97] |
| **Combination of abbreviated methods/tools** | **Rapid review methods**  *Abbreviated search+single screening:*  Affengruber, Wagner; 2020 [98]  *Search limits (PubMed, new articles, larger trials):*  Marshall, 2019 [99]  *Search limits (English only):*  Pham, 2016 [100]  *Review of reviews for RCTs reported in reviews plus adding individual RCTs:*  Martyn-St James, 2017 [101]  *Search limits, single reviewer screening/data extraction plus 20% checking of second reviewer, unadjusted QUADAS-2 assessment* Taylor-Philips, 2017 [102] | - Workload saving: 2176 fewer title/abstracts and 129 fewer full-texts (Taylor-Philips, 2017) |  |  | - Loss of all data: 3.7-44.7% of MAs [99] - Changes in statistical significance: 6.5-38.6% of MAs [99] - Searching only PubMed had the smallest risk of changed ORs [99] - No differences in results [101] - Changes in MAs: 39/143 of MAs (Pham, 2016) - No meta-analysis possible (<2 studies): 14/143 of MAs [100] - Meta-analysis resulted in less precise pooled estimates (i.e. wider confidence intervals) that did not differ in direction from the original estimate [100] - Same conclusion: 1/3 RR [98] - Insufficient information for the authors to draw conclusions: 2/3 RR [98] |  | - Missed studies: 0/10 studies [101] - Sensitivity: 38%-100% [98] |
| **Rapid review tools**  *SRA- Deduplicator, EndNote, Polyglot Search Translator (PST), RobotReviewer, SRA-Helper:*  Clark, 2021 [103] |  | - Time saving: 30h (12h vs. 42h) [103] |  |  |  | - Error rate: 33 vs 32 errors [103] |

**Abbreviations:**

ASReview: Automated Systematic Review

ASySd: Automated Systematic Synthesis and Data extraction

ChatGPT: Chat Generative Pre-trained Transformer (by OpenAI)

EPPI: Evidence for Policy and Practice Information and Co-ordinating Centre

ExaCT: Extraction of Citations Tool

h: Hours

HTA: Health technology assessment

Κ: Kappa

min: Minutes

ML: Machine learning

NNR: Number needed to read

NR: Not reported

NRS: Non-randomized studies

OR: Odds ratio

PICO: Population, Intervention, Comparison, Outcome

PST: Polyglot search translator

PLUS: McMaster Premium LiteratUre Service

RCT: Randomized controlled trial

RDOR: Pooled relative diagnostic odds ratio

RoB: Risk of bias

RR: Rapid review

ROR: Random effects ratio of odds ratios

RRF@10: Relevant records after screening 10%

SD: Standard deviation

SR: Systematic review

SRA: Systematic Review Assistant

SWIFT: Sciome Workbench for Interactive Computer-Facilitated Text-mining

WSS: Work saved over sampling

References:

1. Paynter RA, Featherstone R, Stoeger E, Fiordalisi C, Voisin C, Adam GP: **A prospective comparison of evidence synthesis search strategies developed with and without text-mining tools**. *J Clin Epidemiol* 2021, **139**:350-360.

2. O'Keefe H, Rankin J, Wallace SA, Beyer F: **Investigation of text-mining methodologies to aid the construction of search strategies in systematic reviews of diagnostic test accuracy-a case study**. *Res* 2023, **14**(1):79-98.

3. Clark JM, Sanders S, Carter M, Honeyman D, Cleo G, Auld Y, Booth D, Condron P, Dalais C, Bateup S *et al*: **Improving the translation of search strategies using the Polyglot Search Translator: a randomized controlled trial**. *J Med Libr Assoc* 2020, **108**(2):195-207.

4. Haas Q, Alvarez DV, Borissov N, Ferdowsi S, von Meyenn L, Trelle S, Teodoro D, Amini P: **Utilizing Artificial Intelligence to Manage COVID-19 Scientific Evidence Torrent with Risklick AI: A Critical Tool for Pharmacology and Therapy Development**. *Pharmacology* 2021, **106**(5-6):244-253.

5. Glanville JM, Lefebvre C, Miles JN, Camosso-Stefinovic J: **How to identify randomized controlled trials in MEDLINE: ten years on**. *J Med Libr Assoc* 2006, **94**(2):130-136.

6. Royle P, Waugh N: **A simplified search strategy for identifying randomised controlled trials for systematic reviews of health care interventions: a comparison with more exhaustive strategies**. *BMC Med Res Methodol* 2005, **5**:23.

7. Waffenschmidt S, Guddat C: **Searches for randomized controlled trials of drugs in MEDLINE and EMBASE using only generic drug names compared with searches applied in current practice in systematic reviews**. *Res* 2015, **6**(2):188-194.

8. Lee E, Dobbins M, Decorby K, McRae L, Tirilis D, Husson H: **An optimal search filter for retrieving systematic reviews and meta-analyses**. *BMC Med Res Methodol* 2012, **12**:51.

9. Furuya-Kanamori L, Lin L, Kostoulas P, Clark J, Xu C: **Limits in the search date for rapid reviews of diagnostic test accuracy studies**. *Res* 2022, **13**:13.

10. Xu C, Ju K, Lin L, Jia P, Kwong JSW, Syed A, Furuya-Kanamori L: **Rapid evidence synthesis approach for limits on the search date: How rapid could it be?** *Res* 2022, **13**(1):68-76.

11. Belter CW: **Citation analysis as a literature search method for systematic reviews**. *J Assoc Soc Inf Sci Technol* 2016, **67**(11):2766-2777.

12. Janssens AC, Gwinn M: **Novel citation-based search method for scientific literature: application to meta-analyses**. *BMC Med Res Methodol* 2015, **15**:84.

13. Janssens A, Gwinn M, Brockman JE, Powell K, Goodman M: **Novel citation-based search method for scientific literature: a validation study**. *BMC Med Res Methodol* 2020, **20**(1):25.

14. Beyer FR, Wright K: **Can we prioritise which databases to search? A case study using a systematic review of frozen shoulder management**. *Health Info Libr J* 2013, **30**(1):49-58.

15. Ewald H, Klerings I, Wagner G, Heise TL, Dobrescu AI, Armijo-Olivo S, Stratil JM, Lhachimi SK, Mittermayr T, Gartlehner G *et al*: **Abbreviated and comprehensive literature searches led to identical or very similar effect estimates: a meta-epidemiological study**. *Journal of Clinical Epidemiology* 2020, **128**:1-12.

16. Ewald H, Klerings I, Wagner G, Heise TL, Stratil JM, Lhachimi SK, Hemkens LG, Gartlehner G, Armijo-Olivo S, Nussbaumer-Streit B: **Searching two or more databases decreased the risk of missing relevant studies: a metaresearch study**. *J Clin Epidemiol* 2022, **149**:154-164.

17. Goossen K, Tenckhoff S, Probst P, Grummich K, Mihaljevic AL, Büchler MW, Diener MK: **Optimal literature search for systematic reviews in surgery**. *Langenbecks Arch Surg* 2018, **403**(1):119-129.

18. Nussbaumer-Streit B, Klerings I, Wagner G, Heise TL, Dobrescu AI, Armijo-Olivo S, Stratil JM, Persad E, Lhachimi SK, Van Noord MG *et al*: **Abbreviated literature searches were viable alternatives to comprehensive searches: a meta-epidemiological study**. *J Clin Epidemiol* 2018, **102**:1-11.

19. Preston L, Carroll C, Gardois P, Paisley S, Kaltenthaler E: **Improving search efficiency for systematic reviews of diagnostic test accuracy: An exploratory study to assess the viability of limiting to MEDLINE, EMBASE and reference checking**. *Systematic Reviews* 2015, **4**(1).

20. Van Enst WA, Scholten RJPM, Whiting P, Zwinderman AH, Hooft L: **Meta-epidemiologic analysis indicates that MEDLINE searches are sufficient for diagnostic test accuracy systematic reviews**. *Journal of Clinical Epidemiology* 2014, **67**(11):1192-1199.

21. Dechartres A, Atal I, Riveros C, Meerpohl J, Ravaud P: **Association between publication characteristics and treatment effect estimates: a meta-epidemiologic study**. *Annals of internal medicine* 2018, **169**(6):385-393.

22. Egger M, Juni P, Bartlett C, Holenstein F, Sterne J: **How important are comprehensive literature searches and the assessment of trial quality in systematic reviews? Empirical study**. *Health Technol Assess* 2003, **7**(1):1-76.

23. Hartling L, Featherstone R, Nuspl M, Shave K, Dryden DM, Vandermeer B: **Grey literature in systematic reviews: a cross-sectional study of the contribution of non-English reports, unpublished studies and dissertations to the results of meta-analyses in child-relevant reviews**. *BMC Med Res Methodol* 2017, **17**(1):64.

24. Hugues A, Di Marco J, Bonan I, Rode G, Cucherat M, Gueyffier F: **Publication language and the estimate of treatment effects of physical therapy on balance and postural control after stroke in meta-analyses of randomised controlled trials**. *Plos one* 2020, **15**(3):e0229822.

25. Moher D, Klassen TP, Schulz KF, Berlin JA, Jadad AR, Liberati A: **What contributions do languages other than English make on the results of meta-analyses?** *Journal of clinical epidemiology* 2000, **53**(9):964-972.

26. Nussbaumer-Streit B, Klerings I, Dobrescu AI, Persad E, Stevens A, Garritty C, Kamel C, Affengruber L, King VJ, Gartlehner G: **Excluding non-English publications from evidence-syntheses did not change conclusions: a meta-epidemiological study**. *J Clin Epidemiol* 2020, **118**:42-54.

27. Pham B, Klassen TP, Lawson ML, Moher D: **Language of publication restrictions in systematic reviews gave different results depending on whether the intervention was conventional or complementary**. *J Clin Epidemiol* 2005, **58**(8):769-776.

28. Hair K, Bahor Z, Macleod M, Liao J, Sena ES: **The Automated Systematic Search Deduplicator (ASySD): a rapid, open-source, interoperable tool to remove duplicate citations in biomedical systematic reviews**. *BMC Biology* 2023, **21**(1):189.

29. Kwon Y, Lemieux M, McTavish J, Wathen N: **Identifying and removing duplicate records from systematic review searches**. *Journal of the Medical Library Association : JMLA* 2015, **103**(4):184-188.

30. Guimaraes NS, Ferreira AJF, Ribeiro Silva RC, de Paula AA, Lisboa CS, Magno L, Ichiara MY, Barreto ML: **Deduplicating records in systematic reviews: there are free, accurate automated ways to do so**. *J Clin Epidemiol* 2022, **152**:110-115.

31. McKeown S, Mir ZM: **Considerations for conducting systematic reviews: evaluating the performance of different methods for de-duplicating references**. *Syst* 2021, **10**(1):38.

32. Borissov N, Haas Q, Minder B, Kopp-Heim D, von Gernler M, Janka H, Teodoro D, Amini P: **Reducing systematic review burden using Deduklick: a novel, automated, reliable, and explainable deduplication algorithm to foster medical research**. *Syst* 2022, **11**(1):172.

33. Cowie K, Rahmatullah A, Hardy N, Holub K, Kallmes K: **Web-Based Software Tools for Systematic Literature Review in Medicine: Systematic Search and Feature Analysis**. *JMIR Med Inform* 2022, **10**(5):e33219.

34. Pallath A, Zhang Q: **Paperfetcher: A tool to automate handsearching and citation searching for systematic reviews**. *Res* 2022, **19**:19.

35. Chapman AL, Morgan LC, Gartlehner G: **Semi-automating the manual literature search for systematic reviews increases efficiency**. *Health Info Libr J* 2010, **27**(1):22-27.

36. Marshall IJ, Trikalinos TA, Soboczenski F, Yun HS, Kell G, Marshall R, Wallace BC: **In a pilot study, automated real-time systematic review updates were feasible, accurate, and work-saving**. *J Clin Epidemiol* 2023, **153**:26-33.

37. Rice M, Ali MU, Fitzpatrick-Lewis D, Kenny M, Raina P, Sherifali D: **Testing the effectiveness of simplified search strategies for updating systematic reviews**. *Journal of Clinical Epidemiology* 2017, **88**:148-153.

38. Sampson M, de Bruijn B, Urquhart C, Shojania K: **Complementary approaches to searching MEDLINE may be sufficient for updating systematic reviews**. *Journal of Clinical Epidemiology* 2016, **78**:108-115.

39. Hemens BJ, Haynes RB: **McMaster Premium LiteratUre Service (PLUS) performed well for identifying new studies for updated Cochrane reviews**. *J Clin Epidemiol* 2012, **65**(1):62-72.e61.

40. Gates M, Elliott SA, Gates A, Sebastianski M, Pillay J, Bialy L, Hartling L: **LOCATE: a prospective evaluation of the value of Leveraging Ongoing Citation Acquisition Techniques for living Evidence syntheses**. *Syst* 2021, **10**(1):116.

41. dos Reis AHS, de Oliveira ALM, Fritsch C, Zouch J, Ferreira P, Polese JC: **Usefulness of machine learning softwares to screen titles of systematic reviews: a methodological study**. *Systematic Reviews* 2023, **12**(1):68.

42. Gates A, Guitard S, Pillay J, Elliott SA, Dyson MP, Newton AS, Hartling L: **Performance and usability of machine learning for screening in systematic reviews: a comparative evaluation of three tools**. *Syst* 2019, **8**(1):278.

43. Gates A, Gates M, DaRosa D, Elliott SA, Pillay J, Rahman S, Vandermeer B, Hartling L: **Decoding semi-automated title-abstract screening: findings from a convenience sample of reviews**. *Systematic Reviews* 2020, **9**(1).

44. Gates A, Gates M, Sebastianski M, Guitard S, Elliott SA, Hartling L: **The semi-automation of title and abstract screening: a retrospective exploration of ways to leverage Abstrackr's relevance predictions in systematic and rapid reviews**. *BMC Med Res Methodol* 2020, **20**(1):139.

45. Gates A, Johnson C, Hartling L: **Technology-assisted title and abstract screening for systematic reviews: a retrospective evaluation of the Abstrackr machine learning tool**. *Syst* 2018, **7**(1):45.

46. Giummarra MJ, Lau G, Gabbe BJ: **Evaluation of text mining to reduce screening workload for injury-focused systematic reviews**. *Inj Prev* 2020, **26**(1):55-60.

47. Harrison H, Griffin SJ, Kuhn I, Usher-Smith JA: **Software tools to support title and abstract screening for systematic reviews in healthcare: An evaluation**. *BMC Med Res Methodol* 2020, **20**(1):7.

48. Li J, Kabouji J, Bouhadoun S, Tanveer S, Filion KB, Gore G, Josephson CB, Kwon CS, Jette N, Bauer PR *et al*: **Sensitivity and specificity of alternative screening methods for systematic reviews using text mining tools**. *J Clin Epidemiol* 2023, **162**:72-80.

49. Rathbone J, Hoffmann T, Glasziou P: **Faster title and abstract screening? Evaluating Abstrackr, a semi-automated online screening program for systematic reviewers**. *Syst* 2015, **4**:80.

50. Reddy SM, Patel S, Weyrich M, Fenton J, Viswanathan M: **Comparison of a traditional systematic review approach with review-of-reviews and semi-automation as strategies to update the evidence**. *Syst* 2020, **9**(1):243.

51. Tsou AY, Treadwell JR, Erinoff E, Schoelles K: **Machine learning for screening prioritization in systematic reviews: comparative performance of Abstrackr and EPPI-Reviewer**. *Syst* 2020, **9**(1):73.

52. Muthu S: **The efficiency of machine learning-assisted platform for article screening in systematic reviews in orthopaedics**. *Int Orthop* 2023, **47**(2):551-556.

53. Oude Wolcherink MJ, Pouwels X, van Dijk SHB, Doggen CJM, Koffijberg H: **Can artificial intelligence separate the wheat from the chaff in systematic reviews of health economic articles?** *Expert Rev Pharmacoecon Outcomes Res* 2023, **23**(9):1049-1056.

54. Pijls BG: **Machine Learning assisted systematic reviewing in orthopaedics**. *Journal of Orthopaedics* 2024, **48**:103-106.

55. van de Schoot R, de Bruin J, Schram R, Zahedi P, de Boer J, Weijdema F, Kramer B, Huijts M, Hoogerwerf M, Ferdinands G *et al*: **An open source machine learning framework for efficient and transparent systematic reviews**. *Nature Machine Intelligence* 2021, **3**(2):125-133.

56. Schopow N, Osterhoff G, Baur D: **Applications of the Natural Language Processing Tool ChatGPT in Clinical Practice: Comparative Study and Augmented Systematic Review**. *JMIR Med Inform* 2023, **11**:e48933.

57. Cleo G, Scott AM, Islam F, Julien B, Beller E: **Usability and acceptability of four systematic review automation software packages: a mixed method design**. *Syst* 2019, **8**(1):145.

58. Gartlehner G, Wagner G, Lux L, Affengruber L, Dobrescu A, Kaminski-Hartenthaler A, Viswanathan M: **Assessing the accuracy of machine-assisted abstract screening with DistillerAI: a user study**. *Syst* 2019, **8**(1):277.

59. Hamel C, Kelly SE, Thavorn K, Rice DB, Wells GA, Hutton B: **An evaluation of DistillerSR's machine learning-based prioritization tool for title/abstract screening - impact on reviewer-relevant outcomes**. *BMC Med Res Methodol* 2020, **20**(1):256.

60. Waffenschmidt S, Sieben W, Jakubeit T, Knelangen M, Overesch I, Bühn S, Pieper D, Skoetz N, Hausner E: **Increasing the efficiency of study selection for systematic reviews using prioritization tools and a single-screening approach**. *Systematic Reviews* 2023, **12**(1):161.

61. Olofsson H, Brolund A, Hellberg C, Silverstein R, Stenstrom K, Osterberg M, Dagerhamn J: **Can abstract screening workload be reduced using text mining? User experiences of the tool Rayyan**. *Res* 2017, **8**(3):275-280.

62. Ouzzani M, Hammady H, Fedorowicz Z, Elmagarmid A: **Rayyan-a web and mobile app for systematic reviews**. *Syst* 2016, **5**(1):210.

63. Valizadeh A, Moassefi M, Nakhostin-Ansari A, Hosseini Asl SH, Saghab Torbati M, Aghajani R, Maleki Ghorbani Z, Faghani S: **Abstract screening using the automated tool Rayyan: results of effectiveness in three diagnostic test accuracy systematic reviews**. *BMC Med Res Methodol* 2022, **22**(1):160.

64. Thomas J, McDonald S, Noel-Storr A, Shemilt I, Elliott J, Mavergames C, Marshall IJ: **Machine learning reduced workload with minimal risk of missing studies: development and evaluation of a randomized controlled trial classifier for Cochrane Reviews**. *J Clin Epidemiol* 2021, **133**:140-151.

65. Chai KEK, Lines RLJ, Gucciardi DF, Ng L: **Research Screener: a machine learning tool to semi-automate abstract screening for systematic reviews**. *Systematic Reviews* 2021, **10**(1).

66. Przybyla P, Brockmeier AJ, Kontonatsios G, Le Pogam MA, McNaught J, von Elm E, Nolan K, Ananiadou S: **Prioritising references for systematic reviews with RobotAnalyst: A user study**. *Res* 2018, **9**(3):470-488.

67. Howard BE, Phillips J, Tandon A, Maharana A, Elmore R, Mav D, Sedykh A, Thayer K, Merrick BA, Walker V *et al*: **SWIFT-Active Screener: Accelerated document screening through active learning and integrated recall estimation**. *Environment International* 2020, **138 (no pagination)**.

68. Mortensen ML, Adam GP, Trikalinos TA, Kraska T, Wallace BC: **An exploration of crowdsourcing citation screening for systematic reviews**. *Res* 2017, **8**(3):366-386.

69. Nama N, Iliriani K, Xia MY, Chen BP, Zhou LL, Pojsupap S, Kappel C, O'Hearn K, Sampson M, Menon K *et al*: **A pilot validation study of crowdsourcing systematic reviews: update of a searchable database of pediatric clinical trials of high-dose vitamin D**. *Transl* 2017, **6**(1):18-26.

70. Ng L, Pitt V, Huckvale K, Clavisi O, Turner T, Gruen R, Elliott JH: **Title and Abstract Screening and Evaluation in Systematic Reviews (TASER): a pilot randomised controlled trial of title and abstract screening by medical students**. *Syst Rev* 2014, **3**:121.

71. Noel-Storr A, Dooley G, Affengruber L, Gartlehner G: **Citation screening using crowdsourcing and machine learning produced accurate results: evaluation of Cochrane's modified Screen4Me service**. *J Clin Epidemiol* 2020, **29**:29.

72. Noel-Storr A, Dooley G, Elliott J, Steele E, Shemilt I, Mavergames C, Wisniewski S, McDonald S, Murano M, Glanville J *et al*: **An evaluation of Cochrane Crowd found that crowdsourcing produced accurate results in identifying randomized trials**. *Journal of Clinical Epidemiology* 2021, **133**:130-139.

73. Noel-Storr AH, Redmond P, Lamé G, Liberati E, Kelly S, Miller L, Dooley G, Paterson A, Burt J: **Crowdsourcing citation-screening in a mixed-studies systematic review: a feasibility study**. *BMC Medical Research Methodology* 2021, **21**(1):88.

74. Noel-Storr A, Gartlehner G, Dooley G, Persad E, Nussbaumer-Streit B: **Crowdsourcing the identification of studies for COVID-19-related Cochrane Rapid Reviews**. *Res Synth Methods* 2022, **13**(5):585-594.

75. Wang Z, Asi N, Elraiyah TA, Abu Dabrh AM, Undavalli C, Glasziou P, Montori V, Murad MH: **Dual computer monitors to increase efficiency of conducting systematic reviews**. *J Clin Epidemiol* 2014, **67**(12):1353-1357.

76. Gartlehner G, Affengruber L, Titscher V, Noel-Storr A, Dooley G, Ballarini N, König F: **Single-reviewer abstract screening missed 13 percent of relevant studies: a crowd-based, randomized controlled trial**. *J Clin Epidemiol* 2020, **121**:20-28.

77. Shemilt I, Khan N, Park S, Thomas J: **Use of cost-effectiveness analysis to compare the efficiency of study identification methods in systematic reviews**. *Syst* 2016, **5**(1):140.

78. Stoll CRT, Izadi S, Fowler S, Green P, Suls J, Colditz GA: **The value of a second reviewer for study selection in systematic reviews**. *Res* 2019, **10**(4):539-545.

79. Mateen FJ, Oh J, Tergas AI, Bhayani NH, Kamdar BB: **Titles versus titles and abstracts for initial screening of articles for systematic reviews**. *Clin Epidemiol* 2013, **5**:89-95.

80. Rathbone J, Albarqouni L, Bakhit M, Beller E, Byambasuren O, Hoffmann T, Scott AM, Glasziou P: **Expediting citation screening using PICo-based title-only screening for identifying studies in scoping searches and rapid reviews**. *Syst* 2017, **6**(1):233.

81. Nama N, Sampson M, Barrowman N, Sandarage R, Menon K, Macartney G, Murto K, Vaccani JP, Katz S, Zemek R *et al*: **Crowdsourcing the Citation Screening Process for Systematic Reviews: Validation Study**. *J Med Internet Res* 2019, **21**(4):e12953.

82. Jap J, Saldanha IJ, Smith BT, Lau J, Schmid CH, Li T, Investigators obotDAA: **Features and functioning of Data Abstraction Assistant, a software application for data abstraction during systematic reviews**. *Research Synthesis Methods* 2019, **10**(1):2-14.

83. Li T, Saldanha IJ, Jap J, Smith BT, Canner J, Hutfless SM, Branch V, Carini S, Chan W, de Bruijn B *et al*: **A randomized trial provided new evidence on the accuracy and efficiency of traditional vs. electronically annotated abstraction approaches in systematic reviews**. *J Clin Epidemiol* 2019, **115**:77-89.

84. Walker VR, Rooney AA: **CEC02-02 Automated and Semi-Automated Approaches for Literature Searching, Screening, and Data Extraction for Systematic Reviews in Environmental Health**. *Toxicology Letters* 2021, **350(Supplement)**:S4.

85. Gates A, Gates M, Sim S, Elliott SA, Pillay J, Hartling L: **Creating efficiencies in the extraction of data from randomized trials: a prospective evaluation of a machine learning and text mining tool**. *BMC Med Res Methodol* 2021, **21**(1):169.

86. Kiritchenko S, de Bruijn B, Carini S, Martin J, Sim I: **ExaCT: automatic extraction of clinical trial characteristics from journal publications**. *BMC Med Inf Decis Mak* 2010, **10**:56.

87. Pradhan R, Hoaglin DC, Cornell M, Liu W, Wang V, Yu H: **Automatic extraction of quantitative data from ClinicalTrials.gov to conduct meta-analyses**. *J Clin Epidemiol* 2019, **105**:92-100.

88. Jelicic Kadic A, Vucic K, Dosenovic S, Sapunar D, Puljak L: **Extracting data from figures with software was faster, with higher interrater reliability than manual extraction**. *J Clin Epidemiol* 2016, **74**:119-123.

89. Buscemi N, Hartling L, Vandermeer B, Tjosvold L, Klassen TP: **Single data extraction generated more errors than double data extraction in systematic reviews**. *J Clin Epidemiol* 2006, **59**(7):697-703.

90. Armijo-Olivo S, Craig R, Campbell S: **Comparing machine and human reviewers to evaluate the risk of bias in randomized controlled trials**. *Res* 2020, **11**(3):484-493.

91. Arno A, Thomas J, Wallace B, Marshall IJ, McKenzie JE, Elliott JH: **Accuracy and Efficiency of Machine Learning-Assisted Risk-of-Bias Assessments in "Real-World" Systematic Reviews : A Noninferiority Randomized Controlled Trial**. *Ann Intern Med* 2022, **175**(7):1001-1009.

92. Gates A, Vandermeer B, Hartling L: **Technology-assisted risk of bias assessment in systematic reviews: a prospective cross-sectional evaluation of the RobotReviewer machine learning tool**. *J Clin Epidemiol* 2018, **96**:54-62.

93. Hirt J, Meichlinger J, Schumacher P, Mueller G: **Agreement in Risk of Bias Assessment Between RobotReviewer and Human Reviewers: An Evaluation Study on Randomised Controlled Trials in Nursing-Related Cochrane Reviews**. *J Nurs Scholarsh* 2021, **53**(2):246-254.

94. Jardim PSJ, Rose CJ, Ames HM, Echavez JFM, Van de Velde S, Muller AE: **Automating risk of bias assessment in systematic reviews: a real-time mixed methods comparison of human researchers to a machine learning system**. *BMC Med Res Methodol* 2022, **22**(1):167.

95. Marshall IJ, Kuiper J, Wallace BC: **RobotReviewer: evaluation of a system for automatically assessing bias in clinical trials**. *J Am Med Inform Assoc* 2016, **23**(1):193-201.

96. Šuster S, Baldwin T, Verspoor K: **Analysis of predictive performance and reliability of classifiers for quality assessment of medical evidence revealed important variation by medical area**. *Journal of Clinical Epidemiology* 2023, **159**:58-69.

97. Pianta MJ, Makrai E, Verspoor KM, Cohn TA, Downie LE: **Crowdsourcing critical appraisal of research evidence (CrowdCARE) was found to be a valid approach to assessing clinical research quality**. *J Clin Epidemiol* 2018, **104**:8-14.

98. Affengruber L, Wagner G, Waffenschmidt S, Lhachimi SK, Nussbaumer-Streit B, Thaler K, Griebler U, Klerings I, Gartlehner G: **Combining abbreviated literature searches with single-reviewer screening: three case studies of rapid reviews**. *Syst Rev* 2020, **9**(1):162.

99. Marshall IJ, Marshall R, Wallace BC, Brassey J, Thomas J: **Rapid reviews may produce different results to systematic reviews: a meta-epidemiological study**. *Journal of clinical epidemiology* 2019, **109**:30-41.

100. Pham MT, Waddell L, Rajic A, Sargeant JM, Papadopoulos A, McEwen SA: **Implications of applying methodological shortcuts to expedite systematic reviews: three case studies using systematic reviews from agri-food public health**. *Res* 2016, **7**(4):433-446.

101. Martyn-St James M, Cooper K, Kaltenthaler E: **Methods for a rapid systematic review and metaanalysis in evaluating selective serotonin reuptake inhibitors for premature ejaculation**. *Evidence & Policy: A Journal of Research, Debate and Practice* 2017, **13**(3):517-538.

102. Taylor-Phillips S, Geppert J, Stinton C, Freeman K, Johnson S, Fraser H, Sutcliffe P, Clarke A: **Comparison of a full systematic review versus rapid review approaches to assess a newborn screening test for tyrosinemia type 1**. *Res* 2017, **8**(4):475-484.

103. Clark J, McFarlane C, Cleo G, Ishikawa Ramos C, Marshall S: **The Impact of Systematic Review Automation Tools on Methodological Quality and Time Taken to Complete Systematic Review Tasks: Case Study**. *JMIR Med Educ* 2021, **7**(2):e24418.
